# Supplementary material for: Is there sufficient evidence regarding signage-based stair use interventions? A sequential meta-analysis
Source: PubMed Central journal article supplement — BMJ Open. 2017 Nov 28;7(11):e012459. doi: 10.1136/bmjopen-2016-012459 (PMC5719260; doi:10.1136/bmjopen-2016-012459), 2017-11-28
Supplement: bmjopen-2016-012459.draft_revisions.pdf [file bmjopen-2016-012459.draft_revisions.pdf]

# BMJ Open

## Is there sufficient evidence regarding signage-based stair-use interventions? A sequential meta-analysis

|                                 |                                                                                                                                                                                                                                                                                                                                                                             |
|---------------------------------|-----------------------------------------------------------------------------------------------------------------------------------------------------------------------------------------------------------------------------------------------------------------------------------------------------------------------------------------------------------------------------|
| Journal:                        | <i>BMJ Open</i>                                                                                                                                                                                                                                                                                                                                                             |
| Manuscript ID                   | bmjopen-2016-012459                                                                                                                                                                                                                                                                                                                                                         |
| Article Type:                   | Research                                                                                                                                                                                                                                                                                                                                                                    |
| Date Submitted by the Author:   | 29-Apr-2016                                                                                                                                                                                                                                                                                                                                                                 |
| Complete List of Authors:       | Bauman, Adrian; University of Sydney, School of Public Health<br>Milton, Karen; University of Oxford, Nuffield Department of Population Health<br>Kariuki, Maina; New South Wales Ministry of Health, Biostatistics Training Officer Program<br>Fedel, Karla; University of Sydney, School of Public Health<br>Lewicka, Mary; University of Sydney, School of Public Health |
| <b>Primary Subject Heading</b>: | Public health                                                                                                                                                                                                                                                                                                                                                               |
| Secondary Subject Heading:      | Public health                                                                                                                                                                                                                                                                                                                                                               |
| Keywords:                       | meta-analysis, stairs, point-of-choice, intervention                                                                                                                                                                                                                                                                                                                        |
|                                 |                                                                                                                                                                                                                                                                                                                                                                             |

SCHOLARONE™  
Manuscripts

1  
2  
3 **Is there sufficient evidence regarding signage-based stair-use interventions? A sequential**  
4 **meta- analysis**  
5  
6

7  
8 Adrian Bauman (1), Karen Milton (1,2), Maina Kariuki (1,3), Karla Fedel (1), Mary Lewicka (1)  
9

10 (1) Prevention Research Collaboration, School of Public Health, Level 6, Building D17,  
11 University of Sydney, NSW 2006, Australia  
12

13 (2) British Heart Foundation Centre on Population Approaches for Non-Communicable  
14 Disease Prevention, Nuffield Department of Population Health, University of Oxford, Oxford  
15 OX3 7LF, England  
16

17 (3) NSW Ministry of Health Biostatistics Training Officer Program, NSW Health, North  
18 Sydney, NSW 2010, Australia  
19  
20  
21

22  
23 **Corresponding author:**

24 Professor Adrian Bauman  
25 Sesquicentenary Professor of Public Health  
26 Prevention Research Collaboration  
27 School of Public Health  
28 Level 6, Building D17  
29 University of Sydney  
30 NSW 2006  
31 Australia  
32 E: [Adrian.Bauman@sydney.edu.au](mailto:Adrian.Bauman@sydney.edu.au)  
33 T: +612 8627 1851  
34  
35  
36  
37

38 Keywords: meta-analysis, stairs, point-of-choice, intervention  
39

40 Word count: 3775  
41  
42  
43  
44  
45  
46  
47  
48  
49  
50  
51  
52  
53  
54  
55  
56  
57  
58  
59  
60

**ABSTRACT**

Objective: The proliferation of studies using motivational signs to promote stair-use continues unabated, with their oft-cited potential for increasing population-level physical activity participation. This study examined all stair use promotional signage studies since 1980, calculating pre- and post- estimates of stair use. The aim of this project was to conduct a sequential meta-analysis to pool intervention effects, in order to determine when the evidence base was sufficient for population-wide dissemination.

Design: Using comparable data from 50 stair-promoting studies (57 unique estimates) we pooled data to assess the effect sizes of such interventions.

Results: At baseline, median stair usage across interventions was 8.1%, with an absolute median increase of 2.2% in stair use following signage-based interventions. The overall pooled odds ratio indicated that participants were 52% more likely to use stairs after exposure to promotional signs (adj. OR 1.52, 95% CI 1.37-1.70). Incremental (sequential) meta-analyses using z-score methods identified that sufficient evidence for stair-use interventions has existed since 2005, with more recent studies providing no further evidence on the effect sizes of such interventions.

Conclusions: This analysis has important policy and practice implications. Researchers continue to publish stair-use interventions without connection to policymakers' needs, and few stair-use interventions are implemented at a population level. Researchers should move away from repeating short-term, small scale, stair sign interventions, to investigating their scalability, adoption and fidelity. Only such research translation efforts will provide sufficient evidence of external validity to inform their scaling up to influence population physical activity.

**Strengths and Limitations of this study**

- The methods enabled pooling of estimates despite study heterogeneity.
- We confined our analyses to studies with signs only, to allow for comparability among interventions.
- We modelled the data using a 'hypothetical effect to detect'
- We did not specifically audit generalisability measures in the included studies.

**Keywords:** meta-analysis, stairs, point-of-choice, intervention

## INTRODUCTION

Effective strategies to increase population levels of physical activity are much needed, given the high burden of non-communicable disease attributable to inactivity.[1] Recent changes in the concepts of physical activity now suggest that total physical activity is important, and that methods to increase active living, through incorporating physical activity into everyday life, are important for achieving population-level change.[2]

One approach to encourage active living is the use of 'point of choice' signs to promote stair use. These interventions involve the short-term installation of a poster or stair-rise banners, to encourage people to take the stairs rather than an adjacent escalator. The promise of stair signage interventions to increase incidental physical activity is substantial.[3]

Furthermore, some studies have explored the physiological effects of regular stair use, and demonstrated cardiometabolic and biomarker improvements in those achieving high levels of stair use.[4-6]

Stair use signage is an environmental intervention that is potentially scalable, and could be delivered in multiple sites across communities. In addition, these interventions are inexpensive, simple to deliver, feasible, and triable - all key elements of any new innovation that is introduced into a population.[7]

Much research has been conducted into the effects of 'point of choice' signs to promote stair use since 1980.[8] Further studies in the 1990s were well publicised and addressed stair promoting signs in underground train stations and shopping centres.[9,10] Since then,

1  
2  
3 a plethora of studies has investigated stair promoting signs and stair-rise banners in  
4  
5 numerous countries, but has focused more on selected settings, such as hospitals and  
6  
7 health facilities, universities and government buildings.[11-13] Other researchers have  
8  
9 focused on the differences in efficacy through minor variations in intervention modality, for  
10  
11 example testing sign position and communication attributes of the message.[14] Effects  
12  
13 have been small but significant since the earliest studies, even in motivated samples such as  
14  
15 School of Public Health staff[15] or American College of Sports Medicine conference  
16  
17 delegates.[16]  
18  
19  
20  
21  
22  
23

24 In the Centres for Disease Control and Prevention (CDC) Community Guide, published in  
25  
26 2002, stair promotional signage was a 'strongly recommended intervention' for public  
27  
28 health approaches to promoting physical activity.[17] The first review of these types of  
29  
30 interventions, which included 8 studies, suggested a net increase of 2.8% in stair use could  
31  
32 be expected following stair promotion signage.[18] Webb et al. (2011) pooled data from six  
33  
34 of their own stair use studies in shopping centres, and reported a two fold increase in the  
35  
36 likelihood of stair use following a motivational sign; baseline stair use was 5.5%, with an  
37  
38 additional 6% increase in stair use following these interventions.[19] Another review of  
39  
40 interventions up to 2006, which included 11 studies, demonstrated a median 2.4% increase  
41  
42 from a median baseline of 8% stair users.[20] This review further demonstrated that effects  
43  
44 were similar across different baseline stair use levels, and with different stair use prompts  
45  
46 and message reinforcers.  
47  
48  
49  
50  
51  
52  
53  
54

55 Nocon et al. (2010) identified 25 studies, with 42 results, and in a narrative review reported  
56  
57 that 31 of 42 effects were significant, with absolute stair use increases ranging from 0.3% to  
58  
59  
60

1  
2  
3 10.6%.[3] The odds ratios for post, compared to pre-signage stair use ranged from 1.05 to  
4  
5 2.93, but due to heterogeneity, formal meta-analysis was not carried out. Finally, Bellicha et  
6  
7 al. (2014) reported an updated systematic review, with 50 studies included.[21] Two-thirds  
8  
9 of stair interventions in workplaces showed significant effects, as did three-quarters of  
10  
11 studies in other settings. Absolute increases following stair promotion signs showed a 4%  
12  
13 increase of the median baseline use. These reviews observed similar effect sizes, and used  
14  
15 similar methods for review and effect size calculation.  
16  
17  
18  
19  
20

21  
22 The present study has three aims which build on previous reviews, but take a specific policy-  
23  
24 relevance approach to these interventions. Our objectives were:  
25

- 26  
27 (i) to carry out a meta-analysis which adjusts for study heterogeneity, to assess the pooled  
28  
29 effect size of stair promotion interventions;  
30  
31 (ii) to identify, using a sequential meta-analysis approach, when in the history of these  
32  
33 interventions was it clear that they were effective; and  
34  
35 (iii) to re-frame the future research agenda in light of policy and practice needs.  
36  
37  
38  
39  
40

## 41 **METHODS**

42  
43  
44  
45 This study followed Preferred Reporting Items for Systematic Reviews and Meta-Analyses  
46  
47 (PRISMA).[22] A literature search was undertaken using two electronic databases, Scopus  
48  
49 and Medline. For each database the following search terms were used, with no restriction  
50  
51 on the year of publication:  
52  
53

54  
55 Scopus: (TITLE-ABS-KEY (stair\* OR ('point of decision'))) OR ('point of decision' AND sign\*) OR  
56  
57 ('point of choice' AND sign\*) AND ('physical activity' OR exercise OR fitness))  
58  
59  
60

1  
2  
3 Medline: stair\* and (point of decision OR point of choice) and (physical activity or exercise)  
4  
5  
6

7  
8 This search identified 823 studies. All titles and abstracts were screened to identify studies  
9  
10 involving a stair use intervention. In total 72 studies were located. The reference list of each  
11  
12 of these papers were also screened, which identified a further 5 stair intervention studies,  
13  
14 giving a total number of 77 papers for potential inclusion in the review. Full papers were  
15  
16 obtained for these 77 studies and assessed for eligibility by at least two members of the  
17  
18 research team.  
19  
20  
21

22  
23  
24 Studies were eligible for inclusion if they used point of decision signs (including posters and  
25  
26 stair rise banners) to encourage stair use, and reported the number of observations, and  
27  
28 either the odds ratio with 95% confidence intervals or the number and percentage of people  
29  
30 observed to use the stairs at baseline and post intervention. Studies were excluded if they  
31  
32 were: a review paper, used self-report data only, reported physiological effects of stair  
33  
34 climbing (as opposed to a behaviour change intervention), and/or used a multi-component  
35  
36 (more than just signage) intervention. These criteria led to the exclusion of 27 papers; the  
37  
38 remaining 50 papers were included in the analysis (see Figure 1). The included studies were  
39  
40 published between 1980 and 2014, reflecting a 34 year period.  
41  
42  
43  
44  
45  
46  
47  
48  
49  
50  
51  
52  
53  
54  
55  
56  
57  
58  
59  
60



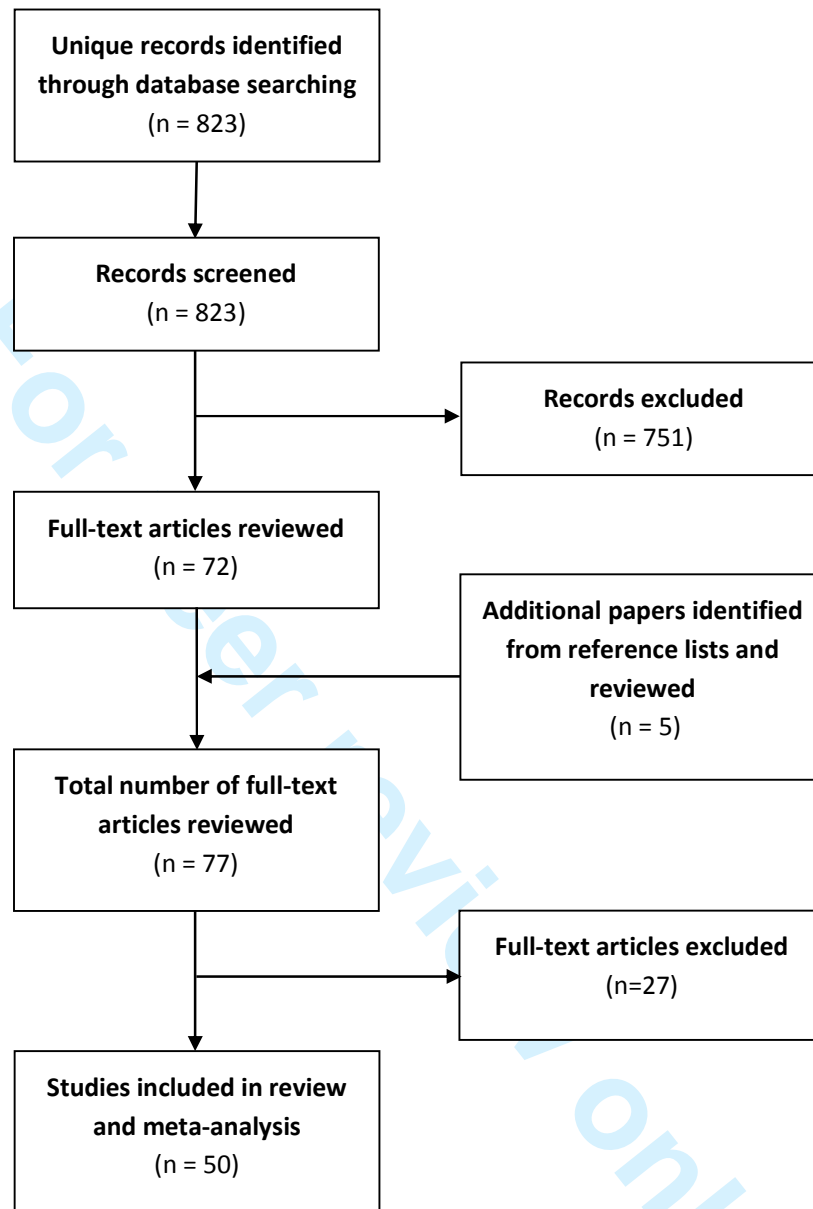

Figure 1. Flow chart of study selection process

1  
2  
3 The first objective was to assess the pooled impact of stair-use signs, as this is the most  
4 generalisable format of this kind of intervention. The current review focused on stair  
5 climbing. If studies reported ascending and descending stair use separately, the ascending  
6 value only was used. For studies which did not differentiate ascending and descending stair  
7 use, the overall stair use data were used. For studies that reported pre- and post- stair use  
8 percentages, with an overall number of total observations, but did not report pre and post  
9 observation numbers separately, we assumed that total volume of pedestrian traffic  
10 remained relatively constant over time. Thus, equal numbers of observations were assumed  
11 during baseline and intervention periods when these periods lasted for the same duration. If  
12 the intervention data collection phase differed in duration to the baseline period, the  
13 number of observations was allocated proportionally.  
14  
15  
16  
17  
18  
19  
20  
21  
22  
23  
24  
25  
26  
27  
28  
29  
30

31 Data were extracted on intervention sites only. Most studies were uncontrolled time series  
32 observations, but where control site data were available, these were not used in this  
33 analysis. For each study, data were extracted on stair use from baseline to the first post-sign  
34 measurement. If longer term follow-up was reported or posters were removed and  
35 replaced with a different poster, these effects were not included in this review. This allowed  
36 us to calculate one comparable estimate per study and therefore ensure even weighting of  
37 studies in the analysis.  
38  
39  
40  
41  
42  
43  
44  
45  
46  
47  
48  
49

50 If studies reported multiple effects for different population sub-groups, for example ethnic  
51 subgroups, males versus females, or those of different age categories, these data were  
52 combined in the analysis into one study estimate. Also, if studies reported the impact of  
53 signs in a range of similar locations, for example different shopping malls or different rail  
54  
55  
56  
57  
58  
59  
60

1  
2  
3 stations, data were pooled for analysis. However, if studies incorporated a range of different  
4  
5 'types' of sites, for example, stair signage at a bank, an airport, a library, and an office (for  
6  
7 example Coleman and Gonzalez, 2001), these were considered as separate intervention  
8  
9 estimates. For most studies one estimate only was used, however for some studies, 2  
10  
11 [Brownell et al., 1980; Kerr et al., 2001e and 2001f], 3 [Lee et al., 2012], or 4 [Coleman and  
12  
13 Gonzalez, 2001] estimates were calculated. A total of 57 estimates were used from 50  
14  
15 studies included in the review (Table A1).  
16  
17  
18  
19  
20

## 21 Analysis

22  
23 Analysis was carried out in two ways. First, effects of the interventions were expressed as  
24  
25 odds ratios, derived from the pre and post signage proportions of stair users. The data were  
26  
27 meta-analysed using Stata 13.[23] We carried out a random effects model of the pooled  
28  
29 odds ratio across the whole 34 year period. In addition, we examined the pooled odds ratios  
30  
31 (ORs) for interventions at an early and later period, based on a median split of estimates  
32  
33 over time; the early period comprised studies published between 1980 and 2007 (n=31  
34  
35 estimates), and the more recent period, 2008 to 2014 (n=26 estimates).  
36  
37  
38  
39  
40  
41  
42

43 The studies' heterogeneity was estimated as weight and a forest plot generated to show the  
44  
45 effect size associated with each study. The estimates included in this study showed high  
46  
47 heterogeneity due to different study designs, different length of pre- and post- follow-up  
48  
49 time periods, use of different stair use signs, and pooling and splitting of some study  
50  
51 outcomes. For this reason, we adjusted for heterogeneity and for multiple testing in the  
52  
53 second phase of analysis. The second part of the analysis used a form of sequential meta-  
54  
55 analysis,[24] with alpha ( $\alpha$ )-spending function and cumulative z-curves monitoring  
56  
57  
58  
59  
60

1  
2  
3 boundaries[25] used to evaluate the evidence of change, while accounting for both  
4  
5 heterogeneity of the estimates and repeated testing of significance. We used the alpha  
6  
7 spending function as a method to ensure that the significance level did not exceed 0.05 at  
8  
9 each step in the sequential analysis, as data from each additional study were included in the  
10  
11 analysis.[26] The critical alpha-values transformed into their corresponding cumulative z-  
12  
13 scores estimates were compared to a z-curve monitoring boundary which identified the  
14  
15 cumulative evidence for intervention effects with each added study estimate. Based on the  
16  
17 median baseline estimate of stair use across studies, we specified a threshold effect of a  
18  
19 10% baseline rate of stair use, and a post intervention effect of 20%, with a maximum type I  
20  
21 error of 5% and a maximum type II error of 10% (90% power). This model provided  
22  
23 information to demonstrate or reject an odds ratio increase of 2 (a priori estimate) in  
24  
25 post-intervention stairs use compared to the assumed 10% pre-intervention control for stair  
26  
27 use studies. The baseline rate of 10% was chosen as it was very close to the median of  
28  
29 baseline stair use estimates in studies used in the meta-analysis.  
30  
31  
32  
33  
34  
35  
36  
37

38 The  $\alpha$ -spending function and cumulative z-curves monitoring boundaries were based on  
39  
40 Sidik-Jonkman reciprocal of the study specific variance and across-study variances.[26] The  
41  
42 conventional fixed-sample two-sided significance level of 0.05 was used, with a critical z-  
43  
44 value fixed at 1.96 added as a reference. The trial sequential analyses with random effect  
45  
46 models were performed using TSA programs.[24]  
47  
48  
49  
50  
51  
52  
53  
54  
55  
56  
57  
58  
59  
60

## RESULTS

Pooled data from the included studies comprised 416565 observations at baseline (including 19 estimates with zero pre-intervention stair use), and 626809 observations post intervention. Across the 57 estimates, the median baseline stair use rate was 8.1% (interquartile range [IQR] 0 - 32.6%) and median post intervention stair use rate was 17.4% (IQR 1.6 - 33.8%).

The median absolute increase (post minus pre proportion of stair users) was 2.2% (IQR 1.1 - 6.4%) and the median relative increase ((post-pre)/pre) was 16.9% (IQR 7.4 - 54.8%). The baseline – post-intervention absolute and relative increases did not differ by period, when intervention estimates were divided into early and late periods (data not shown).

The meta-analysis for earlier (1980-2007), later (2008-2014), and overall studies (1980-2014) indicated that over the whole 34 year period, the likelihood of stair use following the signage intervention was increased by 52% (OR 1.52, 95% CI 1.37 - 1.70, shown in Figure 2). The effect was an increase in the likelihood of stair use of 44% following signs in the earlier period (OR 1.44, 95% CI 1.26 - 1.63), and by 85% (OR 1.85 CI 1.49 to 2.29) in the more recent period. The estimated variations in OR attributable to the studies' heterogeneity (I-squared statistics) were similar for overall, earlier, and later periods (97.5, 97.6, and 97.4% respectively, see Figure 2), indicating high heterogeneity among studies.

## Sequential analysis for stairs use with signs 1980 to 2014

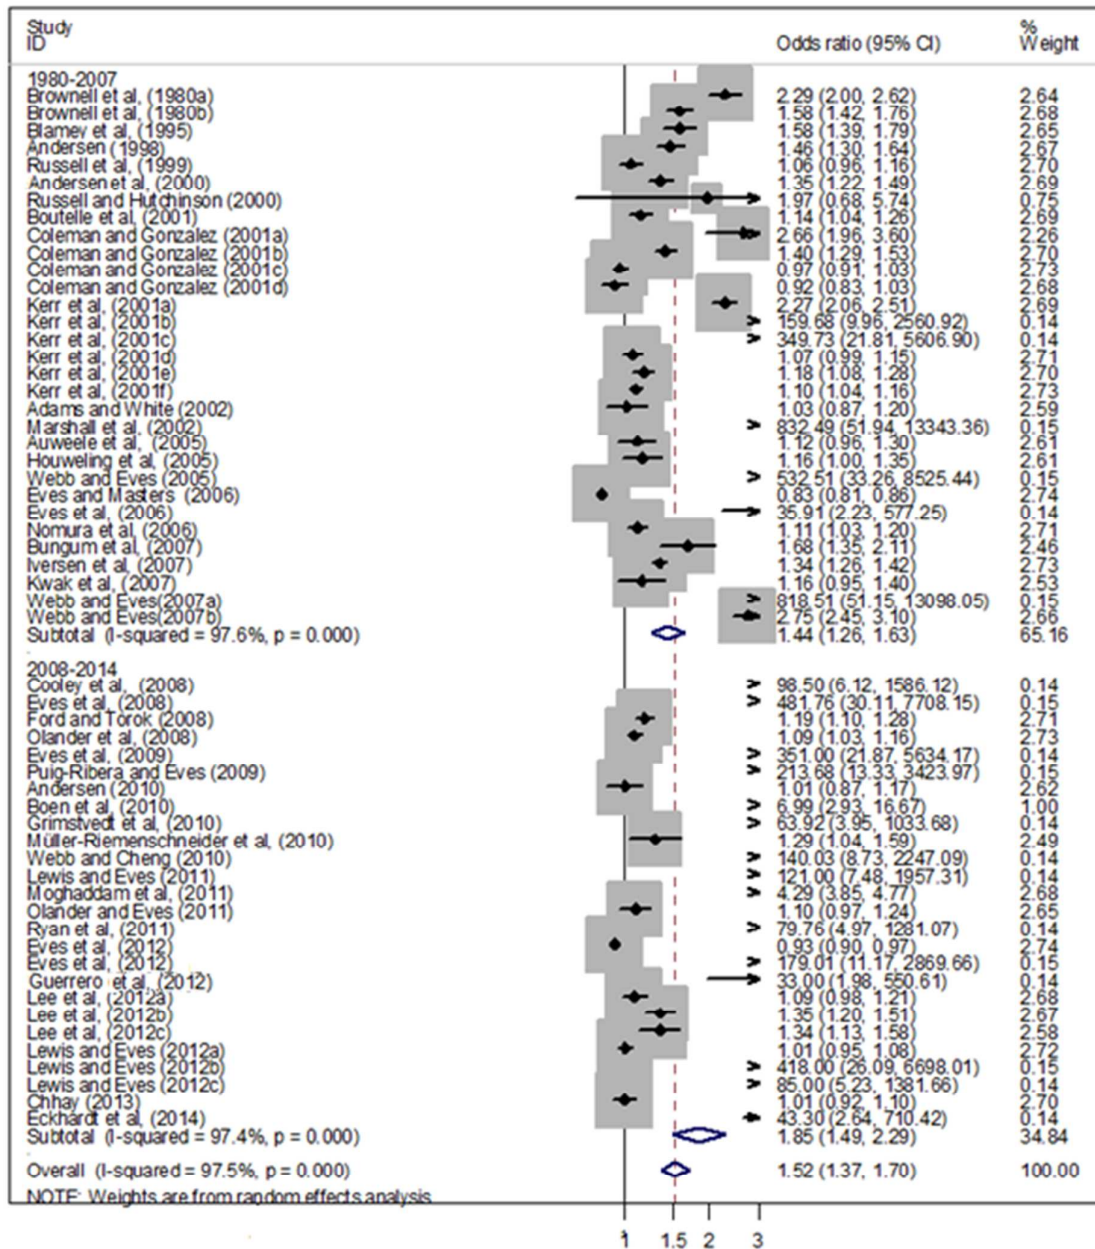

Figure 2. Forest plot of the pre- and post-intervention stair signage effects; studies published from 1980 to 2007 (upper half), later studies published from 2008 to 2014 (lower half of panel), and overall effect size.

**Sequential meta-analysis**

The second set of analyses focused on identifying the point at which the evidence base on stair-use signage was sufficient for generalisable public health action using a sequential meta-analysis. We present the z-curve monitoring boundary to assess the evidence provided by each study sequentially. The threshold boundary curve is shown in Figure 3 as the dashed line (negative slope from left to right), against which z-scores of the data from each study are compared (solid line).

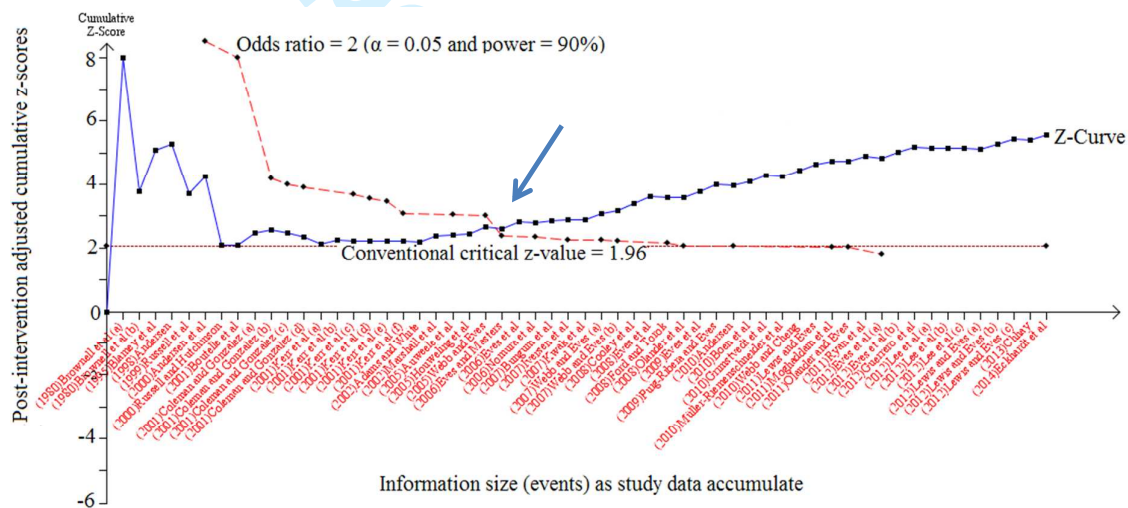

Figure 3. Trial sequential analysis showing the effects of stairs signage interventions published from 1980 to 2014, with heterogeneity and multiple testing adjusted.

Figure 3 shows results from the sequential analysis of all studies from 1980 to 2014. Just considering the study estimates, even the first studies were informative, as the lower line shows that these interventions increased stairs use (that is, the cumulative z-curve crossed the nominal z-value of 1.96 following the first publication). However, due to low volume of

1  
2  
3 pedestrian traffic (events) in the initial studies this inspection lacks the power to show a  
4  
5 significant post intervention effect of 20%.  
6  
7  
8  
9

10 As more studies were added, the sequential analysis accounted for the studies  
11  
12 heterogeneity and multiple testing to show the point where the observed studies'  
13  
14 sequential cumulative z-scores estimates and the monitoring threshold lines cross (study  
15  
16 #23). This is the point at which there is enough accumulated evidence that signage  
17  
18 interventions definitively increase stair usage significantly (arrow in Figure 3). This  
19  
20 corresponds to research published in 2005, suggesting that signage studies published  
21  
22 beyond that date did not contribute further to the evidence base on intervention effect  
23  
24 sizes.  
25  
26  
27  
28  
29  
30

31 Data using the z-curve monitoring boundary was also carried out for each period, and are  
32  
33 shown in the on-line appendix as Figures A1 and A2. Figure A1, for the earlier period 1980-  
34  
35 2007 alone, shows the same result as Figure 2, namely that the threshold point for sufficient  
36  
37 evidence is achieved by 2005. Considering only studies in the later period starting in 2007  
38  
39 (Figure A2), the threshold point was achieved by 2011. This result suggests that even if no  
40  
41 stair sign studies had been conducted prior to 2008, the studies conducted from 2008 –  
42  
43 2011 alone provided sufficient evidence that these interventions are effective at  
44  
45 encouraging stair use.  
46  
47  
48  
49  
50  
51  
52  
53  
54  
55  
56  
57  
58  
59  
60



## DISCUSSION

This review and meta-analysis provides evidence that motivational signs increase the likelihood of stair use by over 50%, with the pooled evidence remaining consistent since 2005. There is a 30+ year history of these types of interventions; the evidence showed a slightly higher effect size in the more recent studies, but this was not significantly different to the effects observed in the early studies.

The absolute effect size of a 2.2% increase in stair use, pooled across 57 estimates in this review, is very similar to summary estimates reported earlier.[18,20] These earlier reviews also noted that effect sizes were similar, irrespective of baseline stair use levels, or of the duration of intervention.[20]

One review considered that motivational and directional signs were better than motivational messages alone, but there were too few studies to assess incremental benefit of stairwell improvements.[21] There is some suggestion that the initial short term impact is greater than repeated sign studies over a longer period.<sup>3</sup> Nonetheless, their 'potential', if applied to populations, could contribute to lifestyle, incidental physical activity only if they are scaled up to the population level.

Stair promoting interventions are inexpensive. An economic appraisal of the costs and benefits of physical activity interventions has shown that point of decision signs are the least costly investments for Governments interested in promoting physical activity.[27] They demonstrate the greatest cost effectiveness in terms of costs per unit change in physical

1  
2  
3 activity in the population; although their individual effects are small, these summate to a  
4  
5 population effect if many inactive people become engaged in stair use.[27]  
6  
7

8  
9  
10 The major concern with stair use studies is not their lack of evidence, but their lack of  
11  
12 translation testing at a population wide scale. Almost all stair sign studies conducted to date  
13  
14 have assessed the short-term impact of motivational signs, placed in a single, or in some  
15  
16 instances multiple, locations, usually shopping malls or rail stations. There is almost no  
17  
18 evidence of external validity in these studies;[21] in the recent proliferation of research  
19  
20 papers, more stair use studies have continued to be conducted in selected locations, such as  
21  
22 universities or health care facilities.  
23  
24  
25

26  
27  
28  
29 The present review identified that there was clear evidence of effectiveness by 2005, yet for  
30  
31 the last decade researchers have explored minor variations to protocols or to behavioural  
32  
33 theory, rather than testing these interventions at the population level. Thus despite a  
34  
35 history of stair use studies, with consistent positive results, their scalability, adoption and  
36  
37 fidelity are not known, and the scaled up evaluation in implementing stair signs in many  
38  
39 hundreds of public sites has not occurred.  
40  
41  
42

43  
44  
45 The disconnection between researcher practice and policymaker need is well characterised  
46  
47 by this type of intervention. Stair use signs are low cost and have the potential to be applied  
48  
49 across whole communities. Therefore this type of intervention is of interest to policymakers  
50  
51 looking for evidence based approaches which can be widely implemented at low cost.  
52  
53

54  
55 Given the “parallel universe” inhabited by researchers,[28] researchers have continued to  
56  
57 test motivational signs in localised settings, unconnected to policymakers’ needs. On the  
58  
59  
60

1  
2  
3 other hand, policymakers think that the evidence is complete, given the large number of  
4  
5 'scientific studies', and are not aware of the need to re-evaluate feasibility at scale. For  
6  
7  
8 example, will the simplicity of the marketed stair-use messages be counter-productive for  
9  
10 health promotion by creating a naïve community perception that health gain can be  
11  
12 achieved by occasional stair use alone? Barriers to stair use signs also need systematic  
13  
14 investigation; such signs may be seen to restrict shopping centre advertising opportunities,  
15  
16 cause injury risk concerns (under building codes and occupational health legislation), and  
17  
18 might pose security issues in airports and some hotels. All of these proposed barriers are  
19  
20 speculative, but would seem to be useful directions for the next generation of studies,  
21  
22 assessing feasibility prior to scaling up interventions. This evaluation step is known as  
23  
24 "translational formative research", [29] and precedes the dissemination of public health  
25  
26 interventions.  
27  
28  
29  
30  
31  
32

33  
34 Despite the lack of translational research, some Government agencies, including Health  
35  
36 Canada [30] and an Australian state Government [31] have developed stair use signs and sent  
37  
38 them out to a myriad of agencies, but no follow up assessment occurred. Process evaluation  
39  
40 of these policy actions at scale is not reported, and their reach and implementation is not  
41  
42 known. Future agency-level dissemination of stair signage could benefit from specific  
43  
44 researcher-policymaker collaboration. [32]  
45  
46  
47  
48  
49  
50  
51  
52  
53  
54  
55  
56  
57  
58  
59  
60

### Strengths and Limitations

Strengths of this study included the methods that enabled pooling of estimates despite study heterogeneity. We confined our analyses to studies with signs only, and excluded additional components of sign-based interventions such as stairwell improvements. The reason for this was for comparability among interventions and because this most minimalist intervention is most replicable in the real world. Further, we modelled these data using a 'hypothetical effect to detect'; this presumed a 10% baseline rate of stair use, and a rate of 20% post intervention; if we had chosen a smaller baseline, approximately 5%, and attempted to identify an effect of 10% post intervention, then the threshold would have been crossed even earlier. We did not specifically audit generalisability measures in the included studies (see Bellicha et al., 2014), although in the context of the current paper, it is perhaps more important to note the lack of translational formative evaluation and assessment of subsequent research undertaken at a population scale.

### CONCLUSION

The clear evidence of effectiveness of stair-promoting interventions is contrasted with their limited public health application. Different kinds of research should comprise future testing of the real world potential of stair signage interventions and their implementation at scale. Three decades of research in this area has not yet achieved substantial dissemination into the population, and the promise of stair-use interventions is not advanced by further repetition of the research conducted in the past decade. Research partnerships are needed between researchers and policymakers to conduct specific scaling-up assessment.[32] This collaborative research is needed to answer the key question; not 'can these interventions

1  
2  
3 work?', but 'is there a realistic potential for stair use interventions to be delivered at a  
4  
5 population scale?'

### 10 **AUTHOR CONTRIBUTIONS**

11  
12 AB conceived the study idea; KF and ML undertook the searches; KM and ML undertook the  
13  
14 review and data extraction; MK undertook the data analysis; AB and KM developed the  
15  
16 manuscript with assistance from MK; all authors approved the final manuscript.  
17  
18

### 22 **FUNDING**

23  
24 This research received no specific grant from any funding agency in the public, commercial  
25  
26 or not-for-profit sectors.  
27  
28

### 32 **COMPETING INTERESTS**

33  
34 All authors have completed the ICMJE uniform disclosure form and declare no support from  
35  
36 any organisation for the submitted work; no financial relationships with any organisations  
37  
38 that might have an interest in the submitted work in the previous three years; no other  
39  
40 relationships or activities that could appear to have influenced the submitted work.  
41  
42

### 45 **DATA SHARING**

46  
47 No additional data available  
48  
49  
50  
51  
52  
53  
54  
55  
56  
57  
58  
59  
60

## REFERENCE LIST

1. Lee IM, Shiroma EJ, Lobelo F, et al. Effect of physical inactivity on major non-communicable diseases worldwide: an analysis of burden of disease and life expectancy. *Lancet* 2012;380(9838):219-29.
2. Kohl HW, Craig CL, Lambert EV, et al. The pandemic of physical inactivity: global action for public health. *Lancet* 2012;380(9838):294-305.
3. Nocon M, Müller-Riemenschneider F, Nitzschke K, et al. Review Article: Increasing physical activity with point-of-choice prompts--a systematic review. *Scand J Public Health* 2010;38(6):633-638.
4. Meyer P, Kayser B, Kossovsky MP, et al. Stairs instead of elevators at workplace: cardioprotective effects of a pragmatic intervention. *Eur J Cardiovasc Prev R* 2010;17: 569.
5. Donath L, Faude O, Roth R, et al. Effects of stair-climbing on balance, gait, strength, resting heart rate, and submaximal endurance in healthy seniors. *Scand J Med Sci Spor* 2014;24:e93–e101.
6. Boreham CA, Kennedy RA, Murphy MH, et al. Training effects of short bouts of stair climbing on cardiorespiratory fitness, blood lipids, and homocysteine in sedentary young women. *Brit J Sport Me.* 2005;39:590-593.
7. Rogers EM, Medina UE, Rivera MA, et al. Complex adaptive systems and the diffusion of innovations. *The Public Sector Innovation Journal* 2005;10(3):1-26.
8. Brownell KD, Stunkard AJ, Albaum JM. Evaluation and modification of exercise patterns in the natural environment. *Am J Psychiat* 1980;137(12):1540-1545.
9. Blamey A, Mutrie N, Aitchison T. Health promotion by encouraged use of stairs. *Bri Med J* 1995;311:289-290.
10. Andersen RE, Franckowiak SC, Snyder J, et al. Can Inexpensive Signs Encourage the Use of Stairs? Results from a Community Intervention. *Ann Intern Med* 1998;129:363-369.
11. Kerr NA, Yore MM, Ham SA, et al. Increasing stair use in a worksite through environmental changes. *Am J Health Promot* 2004;18(4):312-315.
12. Coleman KJ, Gonzalez EC. Promoting Stair Use in a US–Mexico Border Community. *Am J Public Health* 2001;91(12):2007-2009.
13. Marshall AL, Bauman AE, Patch C, et al. Can motivational signs prompt increases in incidental physical activity in an Australian health-care facility? *Health Educ Res* 2002;17(6):743-749.

14. Kerr J, Eves FF, Carroll D. The influence of poster prompts on stair use: The effects of setting, poster size and content. *Brit J Health Psych* 2001;6: 397-405.
15. Boutelle KN, Jeffery RW, Murray DM, et al. Using signs, artwork, and music to promote stair use in a public building. *Am J Public Health* 2001;91(12):2004-2006.
16. Andersen L. *Effects of environmental prompts on stair usage*. (Dissertation). Nevada, Las Vegas: University of Nevada; 2010.
17. Kahn EB, Ramsey LT, Brownson RC, et al. The effectiveness of interventions to increase physical activity: A systematic review. *Am J Prev Med* 2002;22(4):73-107.
18. Dolan MS, Weiss LA, Lewis RA, et al. 'Take the stairs instead of the escalator': effect of environmental prompts on community stair use and implications for a national 'Small Steps' campaign. *Obes Rev* 2006;7:25-32.
19. Webb OJ, Eves F, Kerr J. A statistical summary of mall-based stair-climbing interventions. *Journal of Physical Activity and Health* 2011;8 (4):558-565.
20. Soler RE, Leeks KD, Buchanan LR, et al. Point-of-decision prompts to increase stair use. A systematic review update. *Am J Prev Med* 2010;38(2S): S292-S300.
21. Bellicha A, Kieusseian A, Fontvieille AM, et al. Stair-use interventions in worksites and public settings - A systematic review of effectiveness and external validity. *Prev Med* 2014;70:3-13.
22. Moher D, Liberati A, Tetzlaff J, et al. Preferred reporting items for systematic reviews and meta-analyses: the PRISMA statement. *Annals of internal medicine* 2009; 151(4):264-269.
23. STATA. *Release 13. Statistical software*. College Station, Texas, USA: StataCorp LP; 2013.
24. Thorlund K, Engstrøm J, Wetterslev J, et al. *User manual for trial sequential analysis (TSA)*. Copenhagen Trial Unit, Centre for Clinical Intervention Research, Copenhagen, Denmark; 2011.
25. Lan KG, DeMets DL. Discrete sequential boundaries for clinical trials. *Biometrika* 1983;70(3):659-663.
26. Sidik K, Jonkman JN. Simple heterogeneity variance estimation for meta-analysis. *Journal of Applied Statistical Science* 2005;54(2):367-384.
27. Wu S, Cohen D, Shi Y, et al. Economic analysis of physical activity interventions. *Am J Prev Med* 2011;40:149-158.
28. Brownson RC, Royer C, Ewing R, et al. Researchers and policymakers: travellers in parallel universes. *Am J Prev Med* 2006;30(2):164-172.

- 1  
2  
3 29. O'Hara BJ, Phongsavan P, King L, et al. 'Translational formative evaluation': critical in up-  
4 scaling public health programmes. *Health Promot Int*. 2014;29(1):38-46.  
5  
6 30. Health Canada. *Stairway to Health (StH)*. Ottawa, Canada: Health Canada; 2005.  
7  
8  
9 31. PCAL [Premiers Council for Active Living]. *NSW Take the Stairs posters*. NSW  
10 Government. [http://www.pcal.nsw.gov.au/active\\_workplaces](http://www.pcal.nsw.gov.au/active_workplaces). Accessed November 12,  
11 2015.  
12  
13 32. Brownson RC, Jones E. Bridging the gap: translating research into policy and practice.  
14 *Prev Med* 2009;49(4):313-315.  
15  
16  
17  
18  
19  
20  
21  
22  
23  
24  
25  
26  
27  
28  
29  
30  
31  
32  
33  
34  
35  
36  
37  
38  
39  
40  
41  
42  
43  
44  
45  
46  
47  
48  
49  
50  
51  
52  
53  
54  
55  
56  
57  
58  
59  
60



### Studies included in sequential meta-analysis of stair use studies

Brownell KD, Stunkard AJ, Albaum JM. Evaluation and modification of exercise patterns in the natural environment. *Am J Psychiat* 1980;137(12):1540-1545.

Blamey A, Mutrie N, Aitchison T. Health promotion by encouraged use of stairs. *Brit Med J* 1995;311:289-290.

Andersen RE, Franckowiak SC, Snyder J, et al. Can Inexpensive Signs Encourage the Use of Stairs? Results from a Community Intervention. *Ann Intern Med* 1998;129:363-369.

Russell WD, Dzewaltowski DA, Ryan GJ. The effectiveness of a point-of-decision prompt in deterring sedentary behavior. *Am J Health Promot* 1999;13(5):257-259.

Andersen RE. Community intervention to encourage stair use among African American commuters. *Med Sci Sport Exer* 2000;32:s38.

Russell WD, Hutchinson J. Comparison of health promotion and deterrent prompts to increasing use of stairs over escalators. *Percept Motor Skill* 2000;91(1):55-61.

Boutelle KN, Jeffery RW, Murray DM, et al. Using signs, artwork, and music to promote stair use in a public building. *Am J Public Health* 2001;91(12):2004-2006.

Coleman KJ, Gonzalez EC Promoting Stair Use in a US–Mexico Border Community. *Am J Public Health* 2001;91(12):2007-2009.

Kerr J, Eves FF, Carroll D. Getting more people on the stairs: The impact of a new message format. *J Health Psychol* 2001(a); 6(5):495-500.

Kerr J, Eves F, Carroll D. Six-Month Observational Study of Prompted Stair Climbing. *Prev Med* 2001(b);33:422-427.

Kerr J, Eves F, Carroll D. Encouraging stair use: Stair-riser banners are better than posters. *Am J Public Health* 2001(c);91(8):1192-1193.

Kerr J, Eves FF, Carroll D. Can Posters Prompt Stair Use in a Worksite Environment? *J Occup Health* 2001(d);43:205-207.

Kerr J, Eves FF, Carroll D. The influence of poster prompts on stair use: The effects of setting, poster size and content. *Brit J Health Psych* 2001(e)(f);6:397-405.

Adams J, White M. A systematic approach to the development and evaluation of an intervention promoting stair use. *Health Educ J* 2002;61:272.

Marshall AL, Bauman AE, Patch C, et al. Can motivational signs prompt increases in incidental physical activity in an Australian health-care facility? *Health Educ Res* 2002;17(6):743-749.

1  
2  
3  
4 Auweele YV, Boen F, Schapendonk W, et al. Promoting Stair Use Among Female Employees:  
5 The Effects of a Health Sign Followed by an E-mail. *J Sport Exercise Psy* 2005;27:188-196.  
6

7  
8 Houweling ST, Stoopendaal J, Kleefstra N, et al. Use of stairs in a hospital increased by sign  
9 near the stairs or the elevator. *Ned Tijdschr Geneesk* 2005;149(52):2900-2903.  
10

11 Webb OJ, Eves FF. Promoting stair use: Single versus multiple stair-riser messages. *Am J*  
12 *Public Health* 2005;95(9):1543-1544.  
13

14  
15 Eves FF, Masters RSW. An uphill struggle: Effects of a point-of-choice stair climbing  
16 intervention in a non-English speaking population. *Int J Epidemiol* 2006;35:1286-1290.  
17

18  
19 Eves FF, Webb OJ, Mutrie N. A workplace intervention to promote stair climbing: Greater  
20 effects in the overweight. *Obesity* 2006;14(12):2210-2216.  
21

22  
23 Nomura T, Enoki H, Okazaki R, et al. Promoting daily physical activity by encouraging stair  
24 using banners. *Nihon Eiseigaku Zasshi* 2006;61(1):38-43.  
25

26  
27 Bungum T, Meacham M, Truax N. The Effects of Signage and the Physical Environment on  
28 Stair Usage. *Journal of Physical Activity and Health* 2007;4:237-244.  
29

30  
31 Iversen MK, Handel MN, Jensen EN, et al. Effect of health-promoting posters placed on the  
32 platforms of two train stations in Copenhagen, Denmark, on the choice between taking the  
33 stairs or the escalators: a secondary publication. *Int J Obesity* 2007;31:950-955.  
34

35  
36 Kwak L, Kremers SPJ, van Baak MA, et al. A poster-based intervention to promote stair use  
37 in blue- and white-collar worksites. *Prev Med* 2007;45:177-181.  
38

39  
40 Webb OJ, Eves FF. Effects of environmental changes in stair climbing intervention:  
41 generalization to stair descent. *Am J Health Promot* 2007(a);22(1):38-44.  
42

43  
44 Webb OJ, Eves FF. Promoting stair climbing: intervention effects generalize to a subsequent  
45 stair ascent. *Am J Health Promot* 2007(b);22(2):114-119.  
46

47  
48 Cooley PD, Foley SJ, Magnussen CG. Increasing stair usage in a professional workplace: a test  
49 of the efficacy of positive and negative message prompts to change pedestrian choices.  
50 *Health Promot J Aust* 2008;19: 64-67.  
51

52  
53 Eves FF, Masters RS, Mcmanus A, et al. Contextual barriers to lifestyle physical activity  
54 interventions in Hong Kong. *Med Sci Sport Exer* 2008;40(5):965-71.  
55

56  
57 Ford MA, Torok D. Motivational signage increases physical activity on a college campus. *J*  
58 *Am Coll Health* 2008;57(2):242-244.  
59

60  
Olander EK, Eves FF, Puig-Ribera A. Promoting stair climbing: Stair-riser banners are better  
than posters... sometimes. *Prev Med* 2008;46:308-310.

1  
2  
3  
4 Eves FF, Olander EK, Nicoll G, et al. Increasing stair climbing in a train station: The effects of  
5 contextual variables and visibility. *J Environ Psychol* 2009;29:300-303.  
6

7  
8 Puig-Ribera A, Eves FF. Promoting stair climbing in Barcelona: similarities and differences  
9 with interventions in English-speaking populations. *Eur J Public Health* 2009;20(1):100-102.  
10

11 Andersen L. *Effects of environmental prompts on stair usage*. (Dissertation). Nevada, Las  
12 Vegas: University of Nevada; (2010).  
13

14 Boen F, Maurissen K, Opdenacker J. A simple health sign increases stair use in a shopping  
15 mall and two train stations in Flanders, Belgium. *Health Promot Int* 2010;25(2):183-191.  
16

17  
18 Grimstvedt ME, Kerr J, Oswalt SB, et al. Using signage to promote stair use on a university  
19 campus in hidden and visible stairwells. *Journal of Physical Activity and Health* 2010;7:232-  
20 238.  
21

22  
23 Müller-Riemenschneider F, Nocon M, Reinhold T, et al. Promotion of physical activity using  
24 point-of-decision prompts in Berlin underground stations. *International Journal of*  
25 *Environmental Research and Public Health* 2010;7:3063-3070.  
26

27  
28 Webb OJ, Cheng TF. An informational stair climbing intervention with greater effects in  
29 overweight pedestrians. *Health Educ Res*. 2010;25(6):936-944.  
30

31 Lewis AL, Eves FF. Specific effects of a calorie-based intervention on stair climbing in  
32 overweight commuters. *Ann behav Med* 2011;42(2):257-261.  
33

34 Moghaddam KS, Farahani A, Shanbazi M. Can health-promoting posters increase stair  
35 climbing instead of using escalators? *Soc Sci* 2011;6(6):507-512.  
36

37  
38 Olander EK, Eves FF. Effectiveness and Cost of Two Stair-Climbing Interventions—Less Is  
39 More. *Am J Health Promot* 2011;25(4):231-236.  
40

41 Ryan J, Lyon K, Webb OJ, et al. Promoting physical activity in a low socioeconomic area:  
42 Results from an intervention targeting stair climbing. *Prev Med* 2011;52:352-354.  
43

44  
45 Eves FF, Olander EK, Webb OJ, et al. Likening stairs in buildings to climbing a mountain: Self-  
46 reports of expected effects on stair climbing and objective measures of effectiveness.  
47 *Psychol Sport Exerc* 2012(a);13:170-176.  
48

49  
50 Eves FF, Webb OJ, Griffin C, et al. A multi-component stair climbing promotional campaign  
51 targeting calorific expenditure for worksites; a quasi-experimental study testing effects on  
52 behaviour, attitude and intention. *BMC Public Health* 2012(b);12:423.  
53

54  
55 Guerrero MD, Loughhead TM, Munroe-Chandler KJ. Step up or step in: A stair use  
56 intervention in a university setting. *J Sport Exercise Psy* 2012;34(Suppl.): S1-S4.  
57  
58  
59  
60

1  
2  
3 Lee KK, Perry AS, Wolf SA, et al. Promoting Routine Stair Use - Evaluating the Impact of a  
4 Stair Prompt Across Buildings. *Am J Prev Med* 2012;42(2):136-141.  
5

6  
7 Lewis A, Eves FF. Prompt before the choice is made: Effects of a stair-climbing intervention  
8 in university buildings. *Brit J Health Psych* 2012(a);17:631-643.  
9

10  
11 Lewis AL, Eves FF. Prompts to increase stair climbing in stations: The effect of message  
12 complexity. *Journal of Physical Activity and Health* 2012(b);9:954-961.  
13

14  
15 Lewis AL, Eves FF. Testing the theory underlying the success of point-of-choice prompts: A  
16 multi-component stair climbing intervention. *Psychol Sport Exerc* 2012(c);13: 126-132.  
17

18  
19 Chhay N. *Use of stair prompts to encourage physical activity*. (Unpublished thesis). San Jose,  
20 USA: San Jose State University; 2013.  
21

22  
23 Eckhardt MR, Kerr J, Taylor WC. Point-of-decision signs and stair use in a university worksite  
24 getting: General versus specific messages. *Am J Health Promot* 2014; 29(5):291-293.  
25  
26  
27  
28  
29  
30  
31  
32  
33  
34  
35  
36  
37  
38  
39  
40  
41  
42  
43  
44  
45  
46  
47  
48  
49  
50  
51  
52  
53  
54  
55  
56  
57  
58  
59  
60

Table A1. Stair use signage studies that met the selection criteria for inclusion in the meta-analysis showing the year of publication and the number of pre- and post-stair use observations

| Study Number | Author                                         | year      | Post-intervention   |                        | Pre-intervention    |                        |
|--------------|------------------------------------------------|-----------|---------------------|------------------------|---------------------|------------------------|
|              |                                                |           | Number using stairs | Total number of people | Number using stairs | Total number of people |
| 1            | Brownell, Stunkard, Albaum                     | 1980<br>a | 759                 | 5273                   | 332                 | 5273                   |
| 1            | Brownell, Stunkard, Albaum                     | 1980<br>b | 1981                | 10825                  | 459                 | 3960                   |
| 2            | Blamey, Mutrie, Aitkinson                      | 1995      | 1528                | 8352                   | 323                 | 2784                   |
| 3            | Andersen                                       | 1998      | 923                 | 13151                  | 456                 | 9500                   |
| 4            | Russell, Dzewaltowski, Ryan                    | 1999      | 1269                | 3029                   | 1265                | 3187                   |
| 5            | Andersen, Franckowiak, Zuzak, Cummings, Crespo | 2000      | 975                 | 4479                   | 853                 | 5287                   |
| 6            | Russell and Hutchinson                         | 2000      | 14                  | 91                     | 5                   | 64                     |
| 7            | Boutelle, Jeffery, Murray, Schmitz             | 2001      | 1201                | 9460                   | 788                 | 7095                   |
| 8            | Coleman and Gonzalez                           | 2001<br>a | 154                 | 3386                   | 58                  | 3386                   |
| 8            | Coleman and Gonzalez                           | 2001<br>b | 1353                | 24050                  | 964                 | 24050                  |
| 8            | Coleman and Gonzalez                           | 2001<br>c | 2824                | 8164                   | 2918                | 8164                   |
| 8            | Coleman and Gonzalez                           | 2001<br>d | 855                 | 2788                   | 926                 | 2788                   |
| 9            | Kerr, Eves, Carroll                            | 2001<br>a | 3266                | 17748                  | 479                 | 5916                   |
| 10           | Kerr, Eves, Carroll                            | 2001<br>b | 239                 | 11340                  | 0                   | 3780                   |
| 11           | Kerr, Eves, Carroll                            | 2001<br>c | 262                 | 11999                  | 0                   | 7993                   |
| 12           | Kerr, Eves, Carroll                            | 2001<br>d | 1738                | 7940                   | 1442                | 7042                   |
| 13           | Kerr, Eves, Carroll                            | 2001<br>e | 1103                | 15758                  | 1075                | 18056                  |
| 13           | Kerr, Eves, Carroll                            | 2001<br>f | 3536                | 8440                   | 3216                | 8440                   |
| 14           | Adams and White                                | 2002      | 365                 | 1770                   | 352                 | 1750                   |
| 15           | Marshall, Bauman, Patch, Wilson, Chen          | 2002      | 277                 | 26392                  | 0                   | 39588                  |
| 16           | Auweele, Boen, Schapendonk, Dornez             | 2005      | 581                 | 755                    | 568                 | 823                    |
| 17           | Houweling, Stoopendaal,                        | 2005      | 565                 | 891                    | 486                 | 891                    |

| Study Number | Author                                              | year      | Post-intervention   |                        | Pre-intervention    |                        |
|--------------|-----------------------------------------------------|-----------|---------------------|------------------------|---------------------|------------------------|
|              |                                                     |           | Number using stairs | Total number of people | Number using stairs | Total number of people |
|              | Kleefstra, Meyboom-de Jong, Bilo                    |           |                     |                        |                     |                        |
| 18           | Webb and Eves                                       | 2005      | 532                 | 21732                  | 0                   | 10866                  |
| 19           | Eves and Masters                                    | 2006      | 8670                | 28901                  | 10404               | 28901                  |
| 20           | Eves, Webb, Mutrie                                  | 2006      | 132                 | 28901                  | 0                   | 3916                   |
| 21           | Nomura, Enopki, Okazaki, Sato                       | 2006      | 2872                | 5620                   | 1293                | 2810                   |
| 22           | Bungum, Meacham, Truax                              | 2007      | 273                 | 711                    | 154                 | 675                    |
| 23           | Iversen, Handel, Jensen, Frederiksen, Heitmann      | 2007      | 2876                | 10800                  | 2184                | 10983                  |
| 24           | Kwak, Kremers, van Baak, Brug                       | 2007      | 382                 | 1012                   | 223                 | 683                    |
| 25           | Webb and Eves                                       | 2007<br>a | 818                 | 28206                  | 0                   | 14103                  |
| 26           | Webb and Eves                                       | 2007<br>b | 1928                | 13204                  | 350                 | 6602                   |
| 27           | Cooley, Foley, Magnussen                            | 2008      | 98                  | 16362                  | 0                   | 8181                   |
| 28           | Eves, Masters, McManus, Leung, Wong, White          | 2008      | 963                 | 61368                  | 0                   | 15342                  |
| 29           | Ford and Torok                                      | 2008      | 1686                | 6022                   | 1459                | 6182                   |
| 30           | Olander, Eves, Puig-Ribera                          | 2008      | 2833                | 6396                   | 3030                | 7462                   |
| 31           | Eves, Olander, Nicoll, Puig-Ribera, Griffin         | 2009      | 175                 | 20859                  | 0                   | 20859                  |
| 32           | Puig-Ribera and Eves                                | 2009      | 320                 | 22080                  | 0                   | 7360                   |
| 33           | Andersen                                            | 2010      | 834                 | 951                    | 555                 | 639                    |
| 34           | Boen, Maurissen, Opdenacker                         | 2010      | 41                  | 351                    | 6                   | 359                    |
| 35           | Grimstvedt, Kerr, Oswald, Fogt, Vargas-Tonsing, Yin | 2010      | 63                  | 3845                   | 0                   | 1935                   |
| 36           | Müller-Riemenschneider, Nocon, Reinhold, Willich    | 2010      | 242                 | 796                    | 205                 | 867                    |
| 37           | Webb and Cheng                                      | 2010      | 196                 | 15341                  | 0                   | 5466                   |
| 38           | Lewis and Eves                                      | 2011      | 60                  | 4624                   | 0                   | 4624                   |
| 39           | Moghaddam, Farahani, Shanbazi                       | 2011      | 1877                | 9727                   | 438                 | 9727                   |
| 40           | Olander and Eves                                    | 2011      | 720                 | 1368                   | 762                 | 1590                   |
| 41           | Ryan, Lyon, Webb, Eves, Cormac, Ryan                | 2011      | 159                 | 12212                  | 0                   | 3053                   |
| 42           | Eves, Olander, Webb, Griffin, Chambers              | 2012<br>a | 7708                | 36187                  | 6075                | 26529                  |
| 43           | Eves, Webb, Griffin, Chambers                       | 2012<br>b | 268                 | 21642                  | 0                   | 7214                   |
| 44           | Guerrero, Loughead, Munroe-Chandler                 | 2012      | 16                  | 1327                   | 0                   | 1327                   |

| Study Number | Author                                                                 | year      | Post-intervention   |                        | Pre-intervention    |                        |
|--------------|------------------------------------------------------------------------|-----------|---------------------|------------------------|---------------------|------------------------|
|              |                                                                        |           | Number using stairs | Total number of people | Number using stairs | Total number of people |
| 45           | Lee, Perry, Wolf, Agarwal, Rosenblum, Fischer, Grimshaw, Wener, Silver | 2012<br>a | 1313                | 1716                   | 1203                | 1716                   |
| 45           | Lee, Perry, Wolf, Agarwal, Rosenblum, Fischer, Grimshaw, Wener, Silver | 2012<br>b | 871                 | 2576                   | 647                 | 2576                   |
| 45           | Lee, Perry, Wolf, Agarwal, Rosenblum, Fischer, Grimshaw, Wener, Silver | 2012<br>c | 375                 | 2157                   | 280                 | 2157                   |
| 46           | Lewis and Eves                                                         | 2012<br>a | 3403                | 5662                   | 2746                | 4623                   |
| 47           | Lewis and Eves                                                         | 2012<br>b | 313                 | 29217                  | 0                   | 19478                  |
| 48           | Lewis and Eves                                                         | 2012<br>c | 42                  | 4217                   | 0                   | 4217                   |
| 49           | Chhay                                                                  | 2013      | 1631                | 2961                   | 1315                | 2406                   |
| 50           | Eckhardt, Kerr, Taylor                                                 | 2014      | 27                  | 1677                   | 0                   | 1320                   |

4  
5  
6  
7  
8

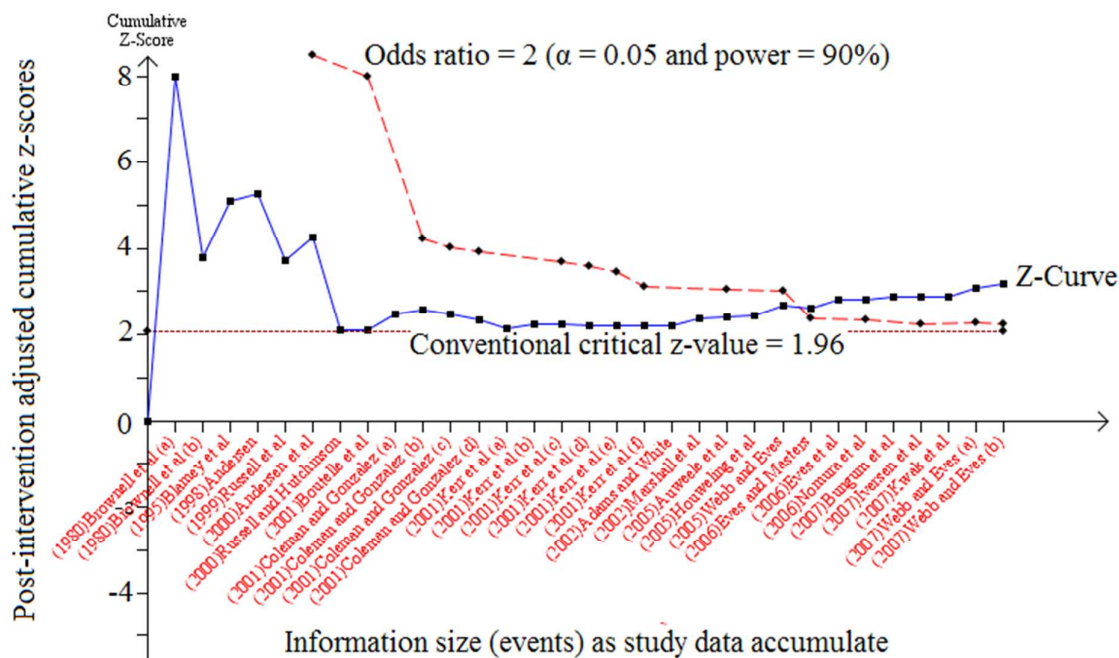

Figure A1. Trial sequential analysis showing the effects of stairs signage interventions published from 1980 to 2007, with heterogeneity-adjusted.

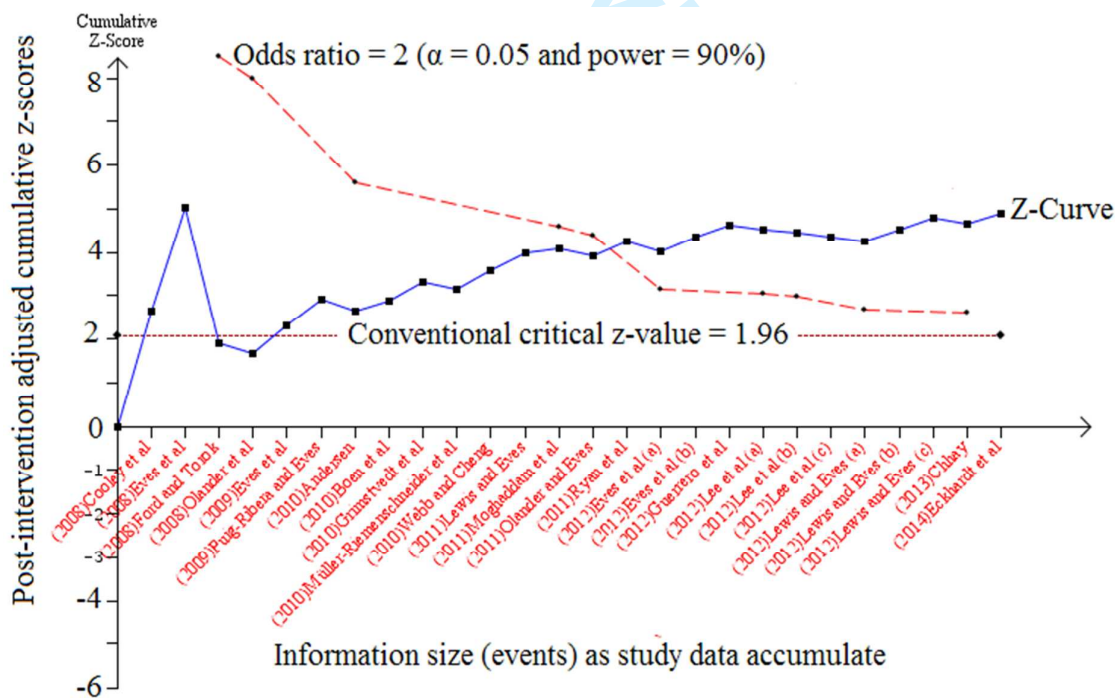

Figure A2. Trial sequential analysis showing the effects of stairs signage interventions published from 2008 to 2014 with heterogeneity-adjusted.



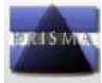

# PRISMA 2009 Checklist

1  
2  
3  
4  
5  
6  
7  
8  
9  
10  
11  
12  
13  
14  
15  
16  
17  
18  
19  
20  
21  
22  
23  
24  
25  
26  
27  
28  
29  
30  
31  
32  
33  
34  
35  
36  
37  
38  
39  
40  
41  
42  
43  
44  
45  
46  
47  
48  
49

| Section/topic                      | #  | Checklist item                                                                                                                                                                                                                                                                                              | Reported on page # |
|------------------------------------|----|-------------------------------------------------------------------------------------------------------------------------------------------------------------------------------------------------------------------------------------------------------------------------------------------------------------|--------------------|
| <b>TITLE</b>                       |    |                                                                                                                                                                                                                                                                                                             |                    |
| Title                              | 1  | Identify the report as a systematic review, meta-analysis, or both.                                                                                                                                                                                                                                         | 5,9                |
| <b>ABSTRACT</b>                    |    |                                                                                                                                                                                                                                                                                                             |                    |
| Structured summary                 | 2  | Provide a structured summary including, as applicable: background; objectives; data sources; study eligibility criteria, participants, and interventions; study appraisal and synthesis methods; results; limitations; conclusions and implications of key findings; systematic review registration number. | 2                  |
| <b>INTRODUCTION</b>                |    |                                                                                                                                                                                                                                                                                                             |                    |
| Rationale                          | 3  | Describe the rationale for the review in the context of what is already known.                                                                                                                                                                                                                              | 5                  |
| Objectives                         | 4  | Provide an explicit statement of questions being addressed with reference to participants, interventions, comparisons, outcomes, and study design (PICOS).                                                                                                                                                  | 5                  |
| <b>METHODS</b>                     |    |                                                                                                                                                                                                                                                                                                             |                    |
| Protocol and registration          | 5  | Indicate if a review protocol exists, if and where it can be accessed (e.g., Web address), and, if available, provide registration information including registration number.                                                                                                                               | N/A                |
| Eligibility criteria               | 6  | Specify study characteristics (e.g., PICOS, length of follow-up) and report characteristics (e.g., years considered, language, publication status) used as criteria for eligibility, giving rationale.                                                                                                      | 6                  |
| Information sources                | 7  | Describe all information sources (e.g., databases with dates of coverage, contact with study authors to identify additional studies) in the search and date last searched.                                                                                                                                  | 5-6                |
| Search                             | 8  | Present full electronic search strategy for at least one database, including any limits used, such that it could be repeated.                                                                                                                                                                               | 5-6                |
| Study selection                    | 9  | State the process for selecting studies (i.e., screening, eligibility, included in systematic review, and, if applicable, included in the meta-analysis).                                                                                                                                                   | 6                  |
| Data collection process            | 10 | Describe method of data extraction from reports (e.g., piloted forms, independently, in duplicate) and any processes for obtaining and confirming data from investigators.                                                                                                                                  | 8-9                |
| Data items                         | 11 | List and define all variables for which data were sought (e.g., PICOS, funding sources) and any assumptions and simplifications made.                                                                                                                                                                       | 8-10               |
| Risk of bias in individual studies | 12 | Describe methods used for assessing risk of bias of individual studies (including specification of whether this was done at the study or outcome level), and how this information is to be used in any data synthesis.                                                                                      | N/A                |
| Summary measures                   | 13 | State the principal summary measures (e.g., risk ratio, difference in means).                                                                                                                                                                                                                               | 9-10               |
| Synthesis of results               | 14 | Describe the methods of handling data and combining results of studies, if done, including measures of consistency (e.g., $I^2$ for each meta-analysis).                                                                                                                                                    | 8-10               |

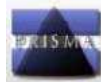

# PRISMA 2009 Checklist

Page 1 of 2

| Section/topic                 | #  | Checklist item                                                                                                                                                                                           | Reported on page #            |
|-------------------------------|----|----------------------------------------------------------------------------------------------------------------------------------------------------------------------------------------------------------|-------------------------------|
| Risk of bias across studies   | 15 | Specify any assessment of risk of bias that may affect the cumulative evidence (e.g., publication bias, selective reporting within studies).                                                             | N/A                           |
| Additional analyses           | 16 | Describe methods of additional analyses (e.g., sensitivity or subgroup analyses, meta-regression), if done, indicating which were pre-specified.                                                         | N/A                           |
| <b>RESULTS</b>                |    |                                                                                                                                                                                                          |                               |
| Study selection               | 17 | Give numbers of studies screened, assessed for eligibility, and included in the review, with reasons for exclusions at each stage, ideally with a flow diagram.                                          | 6-7                           |
| Study characteristics         | 18 | For each study, present characteristics for which data were extracted (e.g., study size, PICOS, follow-up period) and provide the citations.                                                             | Table A1 (supplementary file) |
| Risk of bias within studies   | 19 | Present data on risk of bias of each study and, if available, any outcome level assessment (see item 12).                                                                                                | N/A                           |
| Results of individual studies | 20 | For all outcomes considered (benefits or harms), present, for each study: (a) simple summary data for each intervention group (b) effect estimates and confidence intervals, ideally with a forest plot. | N/A                           |
| Synthesis of results          | 21 | Present results of each meta-analysis done, including confidence intervals and measures of consistency.                                                                                                  | N/A                           |
| Risk of bias across studies   | 22 | Present results of any assessment of risk of bias across studies (see Item 15).                                                                                                                          | N/A                           |
| Additional analysis           | 23 | Give results of additional analyses, if done (e.g., sensitivity or subgroup analyses, meta-regression [see Item 16]).                                                                                    | N/A                           |
| <b>DISCUSSION</b>             |    |                                                                                                                                                                                                          |                               |
| Summary of evidence           | 24 | Summarize the main findings including the strength of evidence for each main outcome; consider their relevance to key groups (e.g., healthcare providers, users, and policy makers).                     | 11-17                         |
| Limitations                   | 25 | Discuss limitations at study and outcome level (e.g., risk of bias), and at review-level (e.g., incomplete retrieval of identified research, reporting bias).                                            | 18                            |
| Conclusions                   | 26 | Provide a general interpretation of the results in the context of other evidence, and implications for future research.                                                                                  | 15-17                         |
| <b>FUNDING</b>                |    |                                                                                                                                                                                                          |                               |
| Funding                       | 27 | Describe sources of funding for the systematic review and other support (e.g., supply of data); role of funders for the systematic review.                                                               | N/A                           |

From: Moher D, Liberati A, Tetzlaff J, Altman DG, The PRISMA Group (2009). Preferred Reporting Items for Systematic Reviews and Meta-Analyses: The PRISMA Statement. PLoS Med 6(7): e1000097. doi:10.1371/journal.pmed1000097

For peer review only - <http://bmjopen.bmj.com/site/about/guidelines.xhtml>

For more information, visit: [www.prisma-statement.org](http://www.prisma-statement.org).

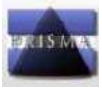

# PRISMA 2009 Checklist

For peer review only

1  
2  
3  
4  
5  
6  
7  
8  
9  
10  
11  
12  
13  
14  
15  
16  
17  
18  
19  
20  
21  
22  
23  
24  
25  
26  
27  
28  
29  
30  
31  
32  
33  
34  
35  
36  
37  
38  
39  
40  
41  
42  
43  
44  
45  
46  
47  
48  
49

# BMJ Open

## Is there sufficient evidence regarding signage-based stair-use interventions? A sequential meta-analysis

|                                 |                                                                                                                                                                                                                                                                                                                                                                             |
|---------------------------------|-----------------------------------------------------------------------------------------------------------------------------------------------------------------------------------------------------------------------------------------------------------------------------------------------------------------------------------------------------------------------------|
| Journal:                        | <i>BMJ Open</i>                                                                                                                                                                                                                                                                                                                                                             |
| Manuscript ID                   | bmjopen-2016-012459.R1                                                                                                                                                                                                                                                                                                                                                      |
| Article Type:                   | Research                                                                                                                                                                                                                                                                                                                                                                    |
| Date Submitted by the Author:   | 13-Sep-2016                                                                                                                                                                                                                                                                                                                                                                 |
| Complete List of Authors:       | Bauman, Adrian; University of Sydney, School of Public Health<br>Milton, Karen; University of Oxford, Nuffield Department of Population Health<br>Kariuki, Maina; New South Wales Ministry of Health, Biostatistics Training Officer Program<br>Fedel, Karla; University of Sydney, School of Public Health<br>Lewicka, Mary; University of Sydney, School of Public Health |
| <b>Primary Subject Heading</b>: | Public health                                                                                                                                                                                                                                                                                                                                                               |
| Secondary Subject Heading:      | Public health                                                                                                                                                                                                                                                                                                                                                               |
| Keywords:                       | meta-analysis, stairs, point-of-choice, intervention                                                                                                                                                                                                                                                                                                                        |
|                                 |                                                                                                                                                                                                                                                                                                                                                                             |

SCHOLARONE™  
Manuscripts

1  
2  
3 **Is there sufficient evidence regarding signage-based stair-use interventions? A sequential**  
4 **meta- analysis**  
5

6  
7  
8 Adrian Bauman (1), Karen Milton (1,2), Maina Kariuki (1,3), Karla Fedel (1), Mary Lewicka (1)  
9

10 (1) Prevention Research Collaboration, School of Public Health, Level 6, Building D17,  
11 University of Sydney, NSW 2006, Australia  
12

13 (2) British Heart Foundation Centre on Population Approaches for Non-Communicable  
14 Disease Prevention, Nuffield Department of Population Health, University of Oxford, Oxford  
15 OX3 7LF, England  
16

17 (3) NSW Ministry of Health Biostatistics Training Officer Program, NSW Health, North  
18 Sydney, NSW 2010, Australia  
19  
20

21  
22  
23 **Corresponding author:**

24 Professor Adrian Bauman  
25 Sesquicentenary Professor of Public Health  
26 Prevention Research Collaboration  
27 School of Public Health  
28 Level 6, Building D17  
29 University of Sydney  
30 NSW 2006  
31 Australia  
32 E: [Adrian.Bauman@sydney.edu.au](mailto:Adrian.Bauman@sydney.edu.au)  
33  
34 T: +612 8627 1851  
35  
36  
37

38 Keywords: meta-analysis, stairs, point-of-choice, intervention  
39

40 Word count: 3775  
41  
42  
43  
44  
45  
46  
47  
48  
49  
50  
51  
52  
53  
54  
55  
56  
57  
58  
59  
60

**ABSTRACT**

Objective: The proliferation of studies using motivational signs to promote stair-use continues unabated, with their oft-cited potential for increasing population-level physical activity participation. This study examined all stair use promotional signage studies since 1980, calculating pre- and post- estimates of stair use. The aim of this project was to conduct a sequential meta-analysis to pool intervention effects, in order to determine when the evidence base was sufficient for population-wide dissemination.

Design: Using comparable data from 50 stair-promoting studies (57 unique estimates) we pooled data to assess the effect sizes of such interventions.

Results: At baseline, median stair usage across interventions was 8.1%, with an absolute median increase of 2.2% in stair use following signage-based interventions. The overall pooled odds ratio indicated that participants were 52% more likely to use stairs after exposure to promotional signs (adj. OR 1.52, 95% CI 1.37-1.70). Incremental (sequential) meta-analyses using z-score methods identified that sufficient evidence for stair-use interventions has existed since 2006, with more recent studies providing no further evidence on the effect sizes of such interventions.

Conclusions: This analysis has important policy and practice implications. Researchers continue to publish stair-use interventions without connection to policymakers' needs, and few stair-use interventions are implemented at a population level. Researchers should move away from repeating short-term, small scale, stair sign interventions, to investigating their scalability, adoption and fidelity. Only such research translation efforts will provide sufficient evidence of external validity to inform their scaling up to influence population physical activity.

**Strengths and Limitations of this study**

- The methods enabled pooling of estimates despite study heterogeneity.
- We confined our analyses to studies with signs only, to allow for comparability among interventions.
- We modelled the data using a 'hypothetical effect to detect'
- We did not specifically audit generalisability measures in the included studies.

**Keywords:** meta-analysis, stairs, point-of-choice, intervention

## INTRODUCTION

Effective strategies to increase population levels of physical activity are much needed, given the high burden of non-communicable disease attributable to inactivity.[1] Recent changes in the concepts of physical activity now suggest that total physical activity is important, and that methods to increase active living, through incorporating physical activity into everyday life, are important for achieving population-level change.[2]

One approach to encourage active living is the use of 'point of choice' signs to promote stair use. These interventions involve the short-term installation of a poster or stair-rise banners, to encourage people to take the stairs rather than an adjacent escalator. The promise of stair signage interventions to increase incidental physical activity is substantial.[3]

Furthermore, some studies have explored the physiological effects of regular stair use, and demonstrated cardio-metabolic and biomarker improvements in those achieving high levels of stair use.[4-6]

Stair use signage is an environmental intervention that is potentially scalable, and could be delivered in multiple sites across communities. In addition, these interventions are inexpensive, simple to deliver, feasible, and trial-able – all key elements of any new innovation that is introduced into a population.[7]

Much research has been conducted into the effects of 'point of choice' signs to promote stair use since 1980.[8] Further studies in the 1990s were well publicised and addressed stair promoting signs in underground train stations and shopping centres.[9,10] Since then,



1  
2  
3 a plethora of studies has investigated stair promoting signs and stair-rise banners in  
4  
5 numerous countries, but has focused more on selected settings, such as hospitals and  
6  
7 health facilities, universities and government buildings.[11-13] Other researchers have  
8  
9 focused on the differences in efficacy through minor variations in intervention modality, for  
10  
11 example testing sign position and communication attributes of the message.[14] Effects  
12  
13 have been small but significant since the earliest studies, even in motivated samples such as  
14  
15 School of Public Health staff[15] or American College of Sports Medicine conference  
16  
17 delegates.[16]  
18  
19  
20  
21  
22  
23

24 In the Centres for Disease Control and Prevention (CDC) Community Guide, published in  
25  
26 2002, stair promotional signage was a 'strongly recommended intervention' for public  
27  
28 health approaches to promoting physical activity.[17] The first review of these types of  
29  
30 interventions, which included 8 studies, suggested a net increase of 2.8% in stair use could  
31  
32 be expected following stair promotion signage.[18] Webb et al. (2011) pooled data from six  
33  
34 of their own stair use studies in shopping centres, and reported a two fold increase in the  
35  
36 likelihood of stair use following a motivational sign; baseline stair use was 5.5%, with an  
37  
38 additional 6% increase in stair use following these interventions.[19] Another review of  
39  
40 interventions up to 2006, which included 11 studies, demonstrated a median 2.4% increase  
41  
42 from a median baseline of 8% stair users.[20] This review further demonstrated that effects  
43  
44 were similar across different baseline stair use levels, and with different stair use prompts  
45  
46 and message reinforcers.  
47  
48  
49  
50  
51  
52  
53  
54

55 Nocon et al. (2010) identified 25 studies, with 42 results, and in a narrative review reported  
56  
57 that 31 of 42 effects were significant, with absolute stair use increases ranging from 0.3% to  
58  
59  
60

1  
2  
3 10.6%.[3] The odds ratios for post, compared to pre-signage stair use ranged from 1.05 to  
4  
5 2.93, but due to heterogeneity, formal meta-analysis was not carried out. Finally, Bellicha et  
6  
7 al. (2014) reported an updated systematic review, with 50 studies included.[21] Two-thirds  
8  
9 of stair interventions in workplaces showed significant effects, as did three-quarters of  
10  
11 studies in other settings. Absolute increases following stair promotion signs showed a 4%  
12  
13 increase of the median baseline use. These reviews observed similar effect sizes, and used  
14  
15 similar methods for review and effect size calculation.  
16  
17  
18  
19  
20

21  
22 The present study has three aims which build on previous reviews, but take a specific policy-  
23  
24 relevance approach to these interventions. Our objectives were:  
25

- 26  
27 (i) to carry out a meta-analysis which adjusts for study heterogeneity, to assess the pooled  
28  
29 effect size of stair promotion interventions;  
30  
31 (ii) to identify, using a sequential meta-analysis approach, when in the history of these  
32  
33 interventions was it clear that they were effective; and  
34  
35 (iii) to re-frame the future research agenda in light of policy and practice needs.  
36  
37  
38  
39

## 40 41 **METHODS**

42  
43  
44  
45 This study followed Preferred Reporting Items for Systematic Reviews and Meta-Analyses  
46  
47 (PRISMA).[22] A literature search was undertaken using two electronic databases, Scopus  
48  
49 and Medline. For each database the following search terms were used, with no restriction  
50  
51 on the year of publication:  
52  
53

54  
55 Scopus: (TITLE-ABS-KEY (stair\* OR ('point of decision'))) OR ('point of decision' AND sign\*) OR  
56  
57 ('point of choice' AND sign\*) AND ('physical activity' OR exercise OR fitness))  
58  
59  
60

1  
2  
3 Medline: stair\* and (point of decision OR point of choice) and (physical activity or exercise)  
4  
5  
6

7  
8 This search identified 823 studies. All titles and abstracts were screened to identify studies  
9  
10 involving a stair use intervention. In total 72 studies were located. The reference list of each  
11  
12 of these papers were also screened, which identified a further 5 stair intervention studies,  
13  
14 giving a total number of 77 papers for potential inclusion in the review. Full papers were  
15  
16 obtained for these 77 studies and assessed for eligibility by at least two members of the  
17  
18 research team.  
19  
20  
21

22  
23  
24 Studies were eligible for inclusion if they used point of decision signs (including posters and  
25  
26 stair rise banners) to encourage stair use, and reported the number of observations, and  
27  
28 either the odds ratio with 95% confidence intervals or the number and percentage of people  
29  
30 observed to use the stairs at baseline and post intervention. The reported denominator in  
31  
32 these studies was total observations of both stair and escalator/elevator use, and the  
33  
34 primary outcome was the proportion of stair usage pre-post intervention.  
35  
36  
37

38  
39  
40 The included studies typically used direct observation using multiple researchers to count  
41  
42 occurrences of stair use versus escalator/elevator use, with one count recorded each time  
43  
44 an individual took the stairs or escalator from one floor to another. Several studies used  
45  
46 coding of videotape footage,[23] infrared motion sensing [24] or infrared sensing validated  
47  
48 by direct observation.[13,25,26] Studies were excluded if they were: a review paper, used  
49  
50 self-report data only, reported physiological effects of stair climbing (as opposed to a  
51  
52 behaviour change intervention), and/or used a multi-component (more than just signage)  
53  
54 intervention. These criteria led to the exclusion of 27 papers; the remaining 50 papers were  
55  
56  
57  
58  
59  
60

1  
2  
3 included in the analysis (see Figure 1). The included studies were published between 1980  
4  
5 and 2014, reflecting a 34 year period.  
6  
7

8  
9  
10 The first objective was to assess the pooled impact of stair-use signs, as this is the most  
11  
12 generalisable format of this kind of intervention. The current review focused on stair  
13  
14 climbing. If studies reported ascending and descending stair use separately, the ascending  
15  
16 value only was used. For studies which did not differentiate ascending and descending stair  
17  
18 use, the overall stair use data were used. This was the case for fourteen out of the 50  
19  
20 included studies.[9,10,12,13,15,16,24,27-33]  
21  
22  
23

24  
25  
26 For studies that reported pre- and post- stair use percentages, with an overall number of  
27  
28 total observations, but did not report pre and post observation numbers separately, we  
29  
30 assumed that total volume of pedestrian traffic remained relatively constant over time.  
31  
32 Thus, equal numbers of observations were assumed during baseline and intervention  
33  
34 periods when these periods lasted for the same duration. If the intervention data collection  
35  
36 phase differed in duration to the baseline period, the number of observations was allocated  
37  
38 proportionally.  
39  
40  
41  
42  
43  
44

45  
46 Data were extracted on intervention sites only. Most studies were uncontrolled time series  
47  
48 observations, but where control site data were available, these were not used in this  
49  
50 analysis. For each study, data were extracted on stair use from baseline to the first post-sign  
51  
52 measurement. If longer term follow-up was reported or posters were removed and replaced  
53  
54 with a different poster, these effects were not included in this review. This allowed us to  
55  
56  
57  
58  
59  
60

1  
2  
3 calculate one comparable estimate per study and therefore ensure even weighting of  
4  
5 studies in the analysis.  
6  
7  
8  
9

10 If studies reported multiple effects for different population sub-groups, for example ethnic  
11 subgroups, males versus females, or those of different age categories, these data were  
12 combined in the analysis into one study estimate. Also, if studies reported the impact of  
13 signs in a range of similar locations, for example different shopping malls or different rail  
14 stations, data were pooled for analysis. However, if studies incorporated a range of different  
15 'types' of sites, for example, stair signage at a bank, an airport, a library, and an office (for  
16 example [12]), these were considered as separate intervention estimates. For most studies  
17 one estimate only was used, however for some studies, two [8,14(e),14(f)], three [34], or  
18 four [12] estimates were calculated. A total of 57 estimates were used from 50 studies  
19 included in the review (Table A1).  
20  
21  
22  
23  
24  
25  
26  
27  
28  
29  
30  
31  
32  
33  
34  
35

### 36 **Analysis**

37  
38 Analysis was carried out in two ways. First, effects of the interventions were expressed as  
39 odds ratios, derived from the pre and post signage proportions of stair users. The data were  
40 meta-analysed using Stata 13.[35] We carried out a random effects model of the pooled  
41 odds ratio across the whole 34 year period. In addition, we examined the pooled odds ratios  
42 (ORs) for interventions at an early and later period, based on a median split of estimates  
43 over time; the early period comprised studies published between 1980 and 2007 (n=31  
44 estimates), and the more recent period, 2008 to 2014 (n=26 estimates).  
45  
46  
47  
48  
49  
50  
51  
52  
53  
54  
55  
56  
57  
58  
59  
60

1  
2  
3 The studies' heterogeneity was estimated as weight and a forest plot generated to show the  
4  
5 effect size associated with each study. The estimates included in this study showed high  
6  
7 heterogeneity due to different study designs, different length of pre- and post- follow-up  
8  
9 time periods, use of different stair use signs, and pooling and splitting of some study  
10  
11 outcomes. For this reason, we adjusted for heterogeneity and for multiple testing in the  
12  
13 second phase of analysis.  
14  
15

16  
17  
18  
19 The second part of the analysis used a form of sequential meta-analysis,[36] with alpha ( $\alpha$ )-  
20  
21 spending function and cumulative z-curves monitoring boundaries[37] used to evaluate the  
22  
23 evidence of change, while accounting for both heterogeneity of the estimates and repeated  
24  
25 testing of significance. We used the alpha spending function as a method to ensure that the  
26  
27 significance level did not exceed 0.05 at each step in the sequential analysis, as data from  
28  
29 each additional study were included in the analysis.[38] The critical alpha-values  
30  
31 transformed into their corresponding cumulative z-scores estimates were compared to a z-  
32  
33 curve monitoring boundary which identified the cumulative evidence for intervention  
34  
35 effects with each added study estimate. Based on the median baseline estimate of stair use  
36  
37 across studies, we specified a threshold effect of a 10% baseline rate of stair use, and a post  
38  
39 intervention effect of 20%, with a maximum type I error of 5% and a maximum type II error  
40  
41 of 10% (90% power). This model provided information to demonstrate or reject an odds  
42  
43 ratio increase of 2 (a priori estimate) in post-intervention stairs use compared to the  
44  
45 assumed 10% pre-intervention control for stair use studies. The baseline rate of 10% was  
46  
47 chosen as it was very close to the median of baseline stair use estimates in studies used in  
48  
49 the meta-analysis.  
50  
51  
52  
53  
54  
55  
56  
57  
58  
59  
60

1  
2  
3 The  $\alpha$ -spending function and cumulative z-curves monitoring boundaries were based on  
4  
5 Sidik-Jonkman reciprocal of the study specific variance and across-study variances.[38] The  
6  
7 conventional fixed-sample two-sided significance level of 0.05 was used, with a critical z-  
8  
9 value fixed at 1.96 added as a reference. Whilst the sequential meta-analysis accounts for  
10  
11 heterogeneity and repeated significance testing, sensitivity analysis was carried out by  
12  
13 repeating each analysis after the removal of 19 studies that had extreme odds ratios ( $\geq 7$ ),  
14  
15 see Table A1. The trial sequential analyses with random effect models were performed  
16  
17 using the TSA program.[36]  
18  
19  
20  
21  
22  
23

## 24 RESULTS

25  
26  
27 Pooled data from the included studies comprised 416565 observations at baseline (including  
28  
29 19 estimates with zero pre-intervention stair use), and 626809 observations post  
30  
31 intervention. Across the 57 estimates, the median baseline stair use rate was 8.1%  
32  
33 (interquartile range [IQR] 0 - 32.6%) and median post intervention stair use rate was 17.4%  
34  
35 (IQR 1.6 - 33.8%).  
36  
37  
38  
39  
40

41 The median absolute increase (post minus pre proportion of stair users) was 2.2% (IQR 1.1 -  
42  
43 6.4%) and the median relative increase ((post-pre)/pre) was 16.9% (IQR 7.4 - 54.8%). The  
44  
45 baseline – post-intervention absolute and relative increases did not differ by period, when  
46  
47 intervention estimates were divided into early and late periods (data not shown).  
48  
49  
50

51  
52  
53 The meta-analysis for earlier (1980-2007), later (2008-2014), and overall studies (1980-  
54  
55 2014) indicated that over the whole 34 year period, the likelihood of stair use following the  
56  
57  
58  
59  
60

1  
2  
3 signage intervention was increased by 52% (OR 1.52, 95% CI 1.37 - 1.70, shown in Figure 2).  
4  
5 The effect was an increase in the likelihood of stair use of 44% following signs in the earlier  
6  
7 period (OR 1.44, 95% CI 1.26 - 1.63), and by 85% (OR 1.85 CI 1.49 to 2.29) in the more recent  
8  
9 period. The estimated variations in OR attributable to the studies' heterogeneity (I-squared  
10  
11 statistics) were similar for overall, earlier, and later periods (97.5, 97.6, and 97.4%  
12  
13 respectively, see Figure 2), indicating high heterogeneity among studies.  
14  
15  
16  
17  
18  
19

### 20 **Sequential meta-analysis**

21  
22 The second set of analyses focused on identifying the point at which the evidence base on  
23  
24 stair-use signage was sufficient for generalisable public health action using a sequential  
25  
26 meta-analysis. We present the z-curve monitoring boundary to assess the evidence  
27  
28 provided by each study sequentially. The threshold boundary curve is shown in Figure 3 as  
29  
30 the dashed line (negative slope from left to right), against which z-scores of the data from  
31  
32 each study are compared (solid line).  
33  
34  
35  
36  
37

38  
39 Figure 3 shows results from the sequential analysis of all studies from 1980 to 2014. Just  
40  
41 considering the study estimates, even the first studies were informative, as the lower line  
42  
43 shows that these interventions increased stairs use (that is, the cumulative z-curve crossed  
44  
45 the nominal z-value of 1.96 following the first publication). However, due to low volume of  
46  
47 pedestrian traffic (events) in the initial studies this inspection lacks the power to show a  
48  
49 significant post intervention effect of 20%.  
50  
51  
52  
53

54  
55 As more studies were added, the sequential analysis accounted for the studies  
56  
57 heterogeneity and multiple testing to show the point where the observed studies'  
58  
59  
60



1  
2  
3 sequential cumulative z-scores estimates and the monitoring threshold lines cross (study  
4  
5 #24). This is the point at which there is enough accumulated evidence that signage  
6  
7 interventions definitively increase stair usage significantly (arrow in Figure 3). This  
8  
9 corresponds to research published in 2006, suggesting that signage studies published  
10  
11 beyond that date did not contribute further to the evidence base on intervention effect  
12  
13 sizes.  
14  
15

16  
17  
18  
19 Data using the z-curve monitoring boundary was also carried out for each period, and are  
20  
21 shown in the on-line appendix as Figures A1 and A2. Figure A1, for the earlier period 1980-  
22  
23 2007 alone, shows the same result as Figure 2, namely that the threshold point for sufficient  
24  
25 evidence is achieved by 2006. Considering only studies in the later period starting in 2008  
26  
27 (Figure A2), the threshold point was achieved by 2011. This result suggests that even if no  
28  
29 stair sign studies had been conducted prior to 2008, the studies conducted from 2008 –  
30  
31 2011 alone provided sufficient evidence that these interventions are effective at  
32  
33 encouraging stair use.  
34  
35  
36  
37  
38  
39

#### 40 41 **Sensitivity analysis**

42  
43 Sensitivity analysis was performed by removing the studies with the highest heterogeneity  
44  
45 values. This reduced the effect sizes of the outcome and revealed that the initial studies had  
46  
47 the power to show evidence on intervention effect sizes.  
48  
49  
50  
51  
52  
53  
54  
55  
56  
57  
58  
59  
60

## DISCUSSION

This review and meta-analysis provides evidence that motivational signs increase the likelihood of stair use by over 50%, with the pooled evidence remaining consistent since 2006. Sensitivity analysis, which excluded studies with odds ratio  $\geq 7$  showed that the initial study published in 1980 had enough power to reveal evidence of effectiveness of stair use interventions. There is a 30+ year history of these types of interventions; the evidence showed a slightly higher effect size in the more recent studies, but this was not significantly different to the effects observed in the early studies.

The absolute effect size of a 2.2% increase in stair use, pooled across 57 estimates in this review, is very similar to summary estimates reported earlier.[18,20] These earlier reviews also noted that effect sizes were similar, irrespective of baseline stair use levels, or of the duration of intervention.[20]

One review considered that motivational and directional signs were better than motivational messages alone, but there were too few studies to assess incremental benefit of stairwell improvements.[21] There is some suggestion that the initial short term impact is greater than repeated sign studies over a longer period.[3] Nonetheless, their repeatedly stated '*potential*', if applied to populations, could contribute to lifestyle, incidental physical activity only if they are scaled up to the population level.

Stair promoting interventions are inexpensive. An economic appraisal of the costs and benefits of physical activity interventions has shown that point of decision signs are the

1  
2  
3 least costly investments for Governments interested in promoting physical activity.[39] They  
4  
5 demonstrate the greatest cost effectiveness in terms of costs per unit change in physical  
6  
7 activity in the population; although their individual effects are small, these summate to a  
8  
9 population effect on physical activity if many inactive people become engaged in stair  
10  
11 use.[39]  
12  
13

14  
15  
16  
17 The major concern with stair use studies is not their lack of evidence, but their lack of  
18  
19 translation testing at a population wide scale. Almost all stair sign studies conducted to date  
20  
21 have assessed the short-term impact of motivational signs, placed in a single, or in some  
22  
23 instances multiple, locations, usually shopping malls or rail stations. There is almost no  
24  
25 evidence of external validity in these studies;[21] in the recent proliferation of research  
26  
27 papers, more stair use studies have continued to be conducted in selected locations, such as  
28  
29 universities or health care facilities.  
30  
31  
32

33  
34  
35  
36 The present review identified that there was clear evidence of effectiveness by 2006, yet for  
37  
38 the last decade researchers have explored minor variations to protocols or to behavioural  
39  
40 theory, rather than testing these interventions at the population level. Thus despite a  
41  
42 history of stair use studies, with consistent positive results, their scalability, adoption and  
43  
44 fidelity are not known, and the scaled up evaluation in implementing stair signs in many  
45  
46 hundreds of public sites has not occurred.  
47  
48  
49

50  
51  
52 The disconnection between the needs of researchers, practitioners and policymaker is well  
53  
54 characterised by this type of intervention. Stair use signs are low cost and have the potential  
55  
56 to be applied across whole communities. Therefore this type of intervention is of interest to  
57  
58  
59  
60

1  
2  
3 policymakers looking for evidence based approaches which can be widely implemented at  
4  
5 low cost. Given the “parallel universe” inhabited by researchers,[40] researchers have  
6  
7 continued to test motivational signs in localised settings, unconnected to policymakers’  
8  
9 needs. On the other hand, policymakers think that the evidence is complete, given the large  
10  
11 number of ‘scientific studies’, and are not aware of the need to re-evaluate the feasibility of  
12  
13 implementation at scale. For example, will the simplicity of the marketed stair-use messages  
14  
15 be counter-productive for health promotion by creating a naïve community perception that  
16  
17 health gain can be achieved by occasional stair use alone? Barriers to stair use signs also  
18  
19 need systematic investigation; such signs may be seen to restrict shopping centre  
20  
21 advertising opportunities, cause injury risk concerns (under building codes and occupational  
22  
23 health legislation), and might pose security issues in airports and some hotels. All of these  
24  
25 proposed barriers are speculative, but would seem to be useful directions for the next  
26  
27 generation of studies, assessing feasibility prior to scaling up interventions. This evaluation  
28  
29 step is known as “translational formative research”,[41] and precedes the dissemination of  
30  
31 public health interventions.  
32  
33  
34  
35  
36  
37  
38  
39  
40

41 Despite the lack of translational research, some Government agencies, including Health  
42  
43 Canada[42] and an Australian state Government[43] have developed stair use signs and sent  
44  
45 them out to a myriad of agencies, but no follow up assessment occurred. Process evaluation  
46  
47 of these policy actions at scale is not reported, and their reach and implementation is not  
48  
49 known. Future agency-level dissemination of stair signage could benefit from specific  
50  
51 researcher-policy maker collaboration.[44]  
52  
53  
54  
55  
56  
57  
58  
59  
60

### Strengths and Limitations

Strengths of this study included the methods that enabled pooling of estimates despite study heterogeneity. We confined our analyses to studies with signs only, and excluded additional components of sign-based interventions such as stairwell improvements. The reason for this was for comparability among interventions and because this most minimalist intervention is most replicable in the real world. Further, we modelled these data using a 'hypothetical effect to detect'; this presumed a 10% baseline rate of stair use, and a rate of 20% post intervention; if we had chosen a smaller baseline, approximately 5%, and attempted to identify an effect of 10% post intervention, then the threshold would have been crossed even earlier. We did not specifically audit generalisability measures in the included studies (see [21]), although in the context of the current paper, it is perhaps more important to note the lack of translational formative evaluation and assessment of subsequent research undertaken at a population scale.

### CONCLUSION

The clear evidence of effectiveness of stair-promoting interventions is contrasted with their limited public health application. This review has demonstrated that the number of stair use reports that have proliferated in the research literature in the past decade has not added to the evidence base on their established efficacy. Different kinds of research should be carried out, comprising future testing of the real world potential of stair signage interventions and their implementation at scale. Three decades of research in this area has not resulted in substantial dissemination into the population, and the promise of stair-use interventions is not advanced by further repetition of the research conducted in the past decade. Research

1  
2  
3 partnerships are needed between researchers and policymakers to conduct specific scaling-  
4  
5 up assessment.[44] This collaborative research is needed to answer the key question; not  
6  
7 ‘can these interventions work?’, but ‘is there a realistic potential for stair use interventions  
8  
9 to be delivered at a population scale?’  
10  
11  
12  
13  
14  
15  
16  
17  
18  
19  
20  
21  
22  
23  
24  
25  
26  
27  
28  
29  
30  
31  
32  
33  
34  
35  
36  
37  
38  
39  
40  
41  
42  
43  
44  
45  
46  
47  
48  
49  
50  
51  
52  
53  
54  
55  
56  
57  
58  
59  
60

For peer review only

### AUTHOR CONTRIBUTIONS

AB conceived the study idea; KF and ML undertook the searches; KM and ML undertook the review and data extraction; MK undertook the data analysis; AB and KM developed the manuscript with assistance from MK; all authors approved the final manuscript.

### FUNDING

This research received no specific grant from any funding agency in the public, commercial or not-for-profit sectors.

### COMPETING INTERESTS

All authors have completed the ICMJE uniform disclosure form and declare no support from any organisation for the submitted work; no financial relationships with any organisations that might have an interest in the submitted work in the previous three years; no other relationships or activities that could appear to have influenced the submitted work.

### DATA SHARING STATEMENT

All data from this study are included in this manuscript. The original data which were used in the meta-analysis are published in the original studies.

### REFERENCE LIST

1. Lee IM, Shiroma EJ, Lobelo F, et al. Effect of physical inactivity on major non-communicable diseases worldwide: an analysis of burden of disease and life expectancy. *Lancet* 2012;380(9838):219-29.
2. Kohl HW, Craig CL, Lambert EV, et al. The pandemic of physical inactivity: global action for public health. *Lancet* 2012;380(9838):294-305.

3. Nocon M, Müller-Riemenschneider F, Nitzschke K, et al. Review Article: Increasing physical activity with point-of-choice prompts--a systematic review. *Scand J Public Health* 2010;38(6):633-638.
4. Meyer P, Kayser B, Kossovsky MP, et al. Stairs instead of elevators at workplace: cardioprotective effects of a pragmatic intervention. *Eur J Cardiovasc Prev R* 2010;17: 569.
5. Donath L, Faude O, Roth R, et al. Effects of stair-climbing on balance, gait, strength, resting heart rate, and submaximal endurance in healthy seniors. *Scand J Med Sci Spor* 2014;24:e93–e101.
6. Boreham CA, Kennedy RA, Murphy MH, et al. Training effects of short bouts of stair climbing on cardiorespiratory fitness, blood lipids, and homocysteine in sedentary young women. *Brit J Sport Me*. 2005;39:590-593.
7. Rogers EM, Medina UE, Rivera MA, et al. Complex adaptive systems and the diffusion of innovations. *The Public Sector Innovation Journal* 2005;10(3):1-26.
8. Brownell KD, Stunkard AJ, Albaum JM. Evaluation and modification of exercise patterns in the natural environment. *Am J Psychiat* 1980;137(12):1540-1545.
9. Blamey A, Mutrie N, Aitchison T. Health promotion by encouraged use of stairs. *Bri Med J* 1995;311:289-290.
10. Andersen RE, Franckowiak SC, Snyder J, et al. Can inexpensive signs encourage the use of stairs? Results from a community intervention. *Ann Intern Med* 1998;129:363-369.
11. Kerr NA, Yore MM, Ham SA, et al. Increasing stair use in a worksite through environmental changes. *Am J Health Promot* 2004;18(4):312-315.
12. Coleman KJ, Gonzalez EC. Promoting stair use in a US–Mexico border community. *Am J Public Health* 2001;91(12):2007-2009.
13. Marshall AL, Bauman AE, Patch C, et al. Can motivational signs prompt increases in incidental physical activity in an Australian health-care facility? *Health Educ Res* 2002;17(6):743-749.
14. Kerr J, Eves FF, Carroll D. The influence of poster prompts on stair use: The effects of setting, poster size and content. *Brit J Health Psych* 2001;6: 397-405.
15. Boutelle KN, Jeffery RW, Murray DM, et al. Using signs, artwork, and music to promote stair use in a public building. *Am J Public Health* 2001;91(12):2004-2006.
16. Andersen L. *Effects of environmental prompts on stair usage*. (Dissertation). Nevada, Las Vegas: University of Nevada; 2010.



17. Kahn EB, Ramsey LT, Brownson RC, et al. The effectiveness of interventions to increase physical activity: A systematic review. *Am J Prev Med* 2002;22(4):73-107.
18. Dolan MS, Weiss LA, Lewis RA, et al. 'Take the stairs instead of the escalator': effect of environmental prompts on community stair use and implications for a national 'Small Steps' campaign. *Obes Rev* 2006;7:25-32.
19. Webb OJ, Eves F, Kerr J. A statistical summary of mall-based stair-climbing interventions. *Journal of Physical Activity and Health* 2011;8 (4):558-565.
20. Soler RE, Leeks KD, Buchanan LR, et al. Point-of-decision prompts to increase stair use. A systematic review update. *Am J Prev Med* 2010;38(2S): S292–S300.
21. Bellicha A, Kieusseian A, Fontvieille AM, et al. Stair-use interventions in worksites and public settings - A systematic review of effectiveness and external validity. *Prev Med* 2014;70:3-13.
22. Moher D, Liberati A, Tetzlaff J, et al. Preferred reporting items for systematic reviews and meta-analyses: the PRISMA statement. *Annals of internal medicine* 2009; 151(4):264-269.
23. Eves FF, Webb OJ, Mutrie N. A workplace intervention to promote stair climbing: Greater effects in the overweight. *Obesity* 2006;14(12):2210-2216.
24. Cooley PD, Foley SJ, Magnussen CG. Increasing stair usage in a professional workplace: a test of the efficacy of positive and negative message prompts to change pedestrian choices. *Health Promot J Aust* 2008;19: 64-67.
25. Eves FF, Olander EK, Webb OJ, et al. Likening stairs in buildings to climbing a mountain: Self-reports of expected effects on stair climbing and objective measures of effectiveness. *Psychol Sport Exerc* 2012(a);13:170-176.
26. Eves FF, Webb OJ, Griffin C, et al. A multi-component stair climbing promotional campaign targeting calorific expenditure for worksites; a quasi-experimental study testing effects on behaviour, attitude and intention. *BMC Public Health* 2012(b);12:423.
27. Andersen RE. Community intervention to encourage stair use among African American commuters. *Med Sci Sport Exer* 2000;32:s38.
28. Auweele YV, Boen F, Schapendonk W, et al. Promoting stair use among female employees: The effects of a health sign followed by an e-mail. *J Sport Exercise Psy* 2005;27:188-196.
29. Houweling ST, Stoopendaal J, Kleefstra N, et al. Use of stairs in a hospital increased by sign near the stairs or the elevator. *Ned Tijdschr Geneesk* 2005;149(52):2900-2903.
30. Nomura T, Enoki H, Okazaki R, et al. Promoting daily physical activity by encouraging stair using banners. *Nihon Eiseigaku Zasshi* 2006;61(1):38-43.

- 1
- 2
- 3
- 4 31. Bungum T, Meacham M, Truax N. The effects of signage and the physical environment
- 5 on stair usage. *Journal of Physical Activity and Health* 2007;4:237-244.
- 6
- 7
- 8 32. Kwak L, Kremers SPJ, van Baak MA, et al. A poster-based intervention to promote stair
- 9 use in blue- and white-collar worksites. *Prev Med* 2007;45:177-181.
- 10
- 11 33. Grimstvedt ME, Kerr J, Oswalt SB, et al. Using signage to promote stair use on a
- 12 university campus in hidden and visible stairwells. *Journal of Physical Activity and*
- 13 *Health* 2010;7:232-238.
- 14
- 15 34. Lee KK, Perry AS, Wolf SA, et al. Promoting routine stair use - Evaluating the impact of a
- 16 stair prompt across buildings. *Am J Prev Med* 2012;42(2):136-141.
- 17
- 18 35. STATA. *Release 13. Statistical software*. College Station. Texas, USA: StataCorp LP; 2013.
- 19
- 20
- 21 36. Thorlund K, Engstrøm J, Wetterslev J, et al. *User manual for trial sequential analysis*
- 22 *(TSA)*. Copenhagen Trial Unit, Centre for Clinical Intervention Research, Copenhagen,
- 23 Denmark; 2011.
- 24
- 25 37. Lan KG, DeMets DL. Discrete sequential boundaries for clinical trials. *Biometrika*
- 26 1983;70(3):659-663.
- 27
- 28 38. Sidik K, Jonkman JN. Simple heterogeneity variance estimation for meta-analysis.
- 29 *Journal of Applied Statistical Science* 2005;54(2):367-384.
- 30
- 31 39. Wu S, Cohen D, Shi Y, et al. Economic analysis of physical activity interventions. *Am J*
- 32 *Prev Med* 2011;40:149-158.
- 33
- 34 40. Brownson RC, Royer C, Ewing R, et al. Researchers and policymakers: travellers in
- 35 parallel universes. *Am J Prev Med* 2006;30(2):164-172.
- 36
- 37 41. O'Hara BJ, Phongsavan P, King L, et al. 'Translational formative evaluation': critical in up-
- 38 scaling public health programmes. *Health Promot Int*. 2014;29(1):38-46.
- 39
- 40 42. Health Canada. *Stairway to Health (StH)*. Ottawa, Canada: Health Canada; 2005.
- 41
- 42 43. PCAL [Premiers Council for Active Living]. *NSW take the stairs posters*. NSW
- 43 Government. [http://www.pcal.nsw.gov.au/active\\_workplaces](http://www.pcal.nsw.gov.au/active_workplaces). Accessed November 12,
- 44 2015.
- 45
- 46 44. Brownson RC, Jones E. Bridging the gap: translating research into policy and practice.
- 47 *Prev Med* 2009;49(4):313-315.
- 48
- 49
- 50
- 51
- 52
- 53
- 54
- 55
- 56
- 57
- 58
- 59
- 60

1  
2  
3  
4  
5  
6  
7  
8  
9  
10  
11  
12  
13  
14  
15  
16  
17  
18  
19  
20  
21  
22  
23  
24  
25  
26  
27  
28  
29  
30  
31  
32  
33  
34  
35  
36  
37  
38  
39  
40  
41  
42  
43  
44  
45  
46  
47  
48  
49  
50  
51  
52  
53  
54  
55  
56  
57  
58  
59  
60

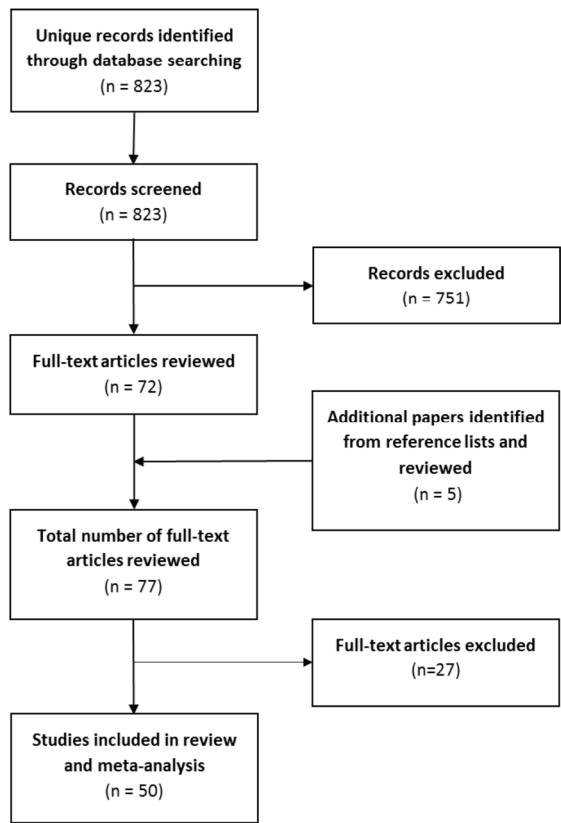

Figure 1. Flow chart of study selection process

209x296mm (300 x 300 DPI)

1  
2  
3  
4  
5  
6  
7  
8  
9  
10  
11  
12  
13  
14  
15  
16  
17  
18  
19  
20  
21  
22  
23  
24  
25  
26  
27  
28  
29  
30  
31  
32  
33  
34  
35  
36  
37  
38  
39  
40  
41  
42  
43  
44  
45  
46  
47  
48  
49  
50  
51  
52  
53  
54  
55  
56  
57  
58  
59  
60

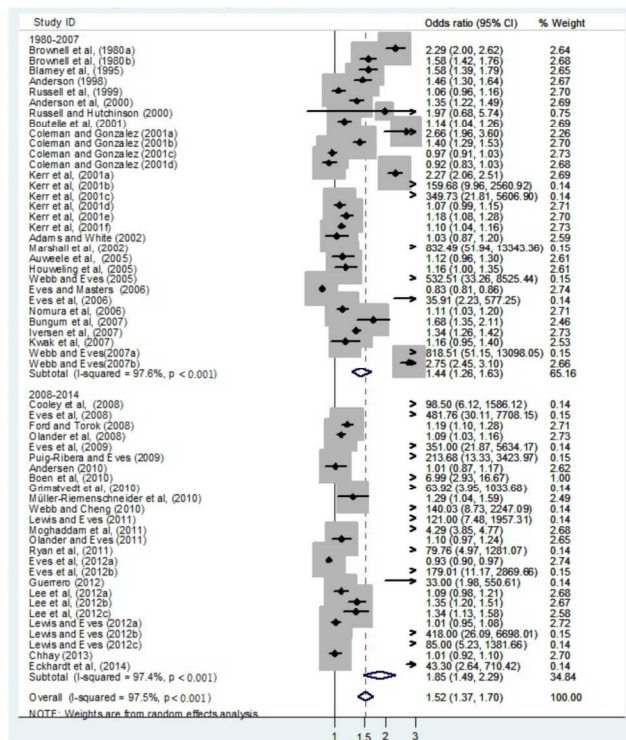

Figure 2. Forest plot of the pre- and post-intervention stair signage effects; studies published from 1980 to 2007 (upper half), later studies published from 2008 to 2014 (lower half of panel), and overall effect size.

209x296mm (300 x 300 DPI)

1  
2  
3  
4  
5  
6  
7  
8  
9  
10  
11  
12  
13  
14  
15  
16  
17  
18  
19  
20  
21  
22  
23  
24  
25  
26  
27  
28  
29  
30  
31  
32  
33  
34  
35  
36  
37  
38  
39  
40  
41  
42  
43  
44  
45  
46  
47  
48  
49  
50  
51  
52  
53  
54  
55  
56  
57  
58  
59  
60

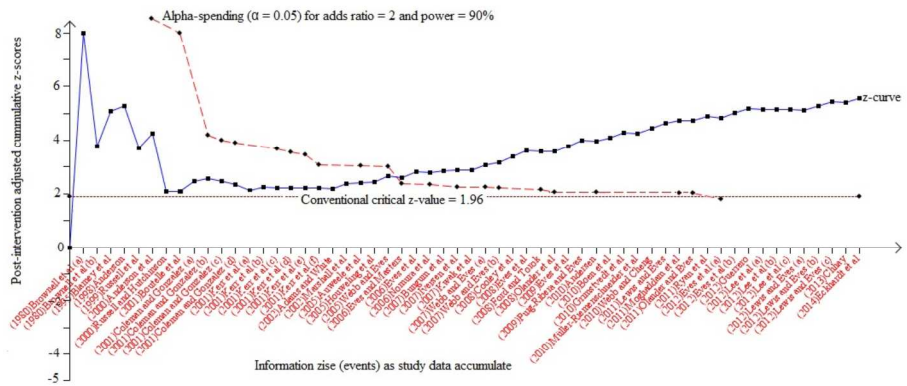

Figure 3. Trial sequential analysis showing the effects of stairs signage interventions published from 1980 to 2014, with heterogeneity and multiple testing adjusted.

296x209mm (300 x 300 DPI)

Review only

Table A1. Stair use signage studies that met the selection criteria for inclusion in the meta-analysis showing the year of publication and the number of pre- and post -stair use observations

| Study Number | Author                                                   | Year  | Post-intervention   |                        | Pre-intervention    |                        |
|--------------|----------------------------------------------------------|-------|---------------------|------------------------|---------------------|------------------------|
|              |                                                          |       | Number using stairs | Total number of people | Number using stairs | Total number of people |
| 1            | Brownell, Stunkard, Albaum                               | 1980a | 759                 | 5273                   | 332                 | 5273                   |
| 1            | Brownell, Stunkard, Albaum                               | 1980b | 1981                | 10825                  | 459                 | 3960                   |
| 2            | Blamey, Mutrie, Aitkinson                                | 1995  | 1528                | 8352                   | 323                 | 2784                   |
| 3            | Andersen                                                 | 1998  | 923                 | 13151                  | 456                 | 9500                   |
| 4            | Russell, Dzewaltowski, Ryan                              | 1999  | 1269                | 3029                   | 1265                | 3187                   |
| 5            | Andersen, Franckowiak, Zuzak, Cummings, Crespo           | 2000  | 975                 | 4479                   | 853                 | 5287                   |
| 6            | Russell and Hutchinson                                   | 2000  | 14                  | 91                     | 5                   | 64                     |
| 7            | Boutelle, Jeffery, Murray, Schmitz                       | 2001  | 1201                | 9460                   | 788                 | 7095                   |
| 8            | Coleman and Gonzalez                                     | 2001a | 154                 | 3386                   | 58                  | 3386                   |
| 8            | Coleman and Gonzalez                                     | 2001b | 1353                | 24050                  | 964                 | 24050                  |
| 8            | Coleman and Gonzalez                                     | 2001c | 2824                | 8164                   | 2918                | 8164                   |
| 8            | Coleman and Gonzalez                                     | 2001d | 855                 | 2788                   | 926                 | 2788                   |
| 9            | Kerr, Eves, Carroll                                      | 2001a | 3266                | 17748                  | 479                 | 5916                   |
| ‡10          | Kerr, Eves, Carroll                                      | 2001b | 239                 | 11340                  | 0                   | 3780                   |
| ‡11          | Kerr, Eves, Carroll                                      | 2001c | 262                 | 11999                  | 0                   | 7993                   |
| 12           | Kerr, Eves, Carroll                                      | 2001d | 1738                | 7940                   | 1442                | 7042                   |
| 13           | Kerr, Eves, Carroll                                      | 2001e | 1103                | 15758                  | 1075                | 18056                  |
| 13           | Kerr, Eves, Carroll                                      | 2001f | 3536                | 8440                   | 3216                | 8440                   |
| 14           | Adams and White                                          | 2002  | 365                 | 1770                   | 352                 | 1750                   |
| ‡15          | Marshall, Bauman, Patch, Wilson, Chen                    | 2002  | 277                 | 26392                  | 0                   | 39588                  |
| 16           | Auweele, Boen, Schapendonk, Dornez                       | 2005  | 581                 | 755                    | 568                 | 823                    |
| 17           | Houweling, Stoopendaal, Kleefstra, Meyboom-de Jong, Bilo | 2005  | 565                 | 891                    | 486                 | 891                    |
| ‡18          | Webb and Eves                                            | 2005  | 532                 | 21732                  | 0                   | 10866                  |
| 19           | Eves and Masters                                         | 2006  | 8670                | 28901                  | 10404               | 28901                  |
| ‡20          | Eves, Webb, Mutrie                                       | 2006  | 132                 | 28901                  | 0                   | 3916                   |
| 21           | Nomura, Enopki, Okazaki, Sato                            | 2006  | 2872                | 5620                   | 1293                | 2810                   |
| 22           | Bungum, Meacham, Truax                                   | 2007  | 273                 | 711                    | 154                 | 675                    |
| 23           | Iversen, Handel, Jensen, Frederiksen, Heitmann           | 2007  | 2876                | 10800                  | 2184                | 10983                  |
| 24           | Kwak, Kremers, van Baak, Brug                            | 2007  | 382                 | 1012                   | 223                 | 683                    |

| Study Number | Author                                                                 | Year  | Post-intervention   |                        | Pre-intervention    |                        |
|--------------|------------------------------------------------------------------------|-------|---------------------|------------------------|---------------------|------------------------|
|              |                                                                        |       | Number using stairs | Total number of people | Number using stairs | Total number of people |
| ‡25          | Webb and Eves                                                          | 2007a | 818                 | 28206                  | 0                   | 14103                  |
| 26           | Webb and Eves                                                          | 2007b | 1928                | 13204                  | 350                 | 6602                   |
| ‡27          | Cooley, Foley, Magnussen                                               | 2008  | 98                  | 16362                  | 0                   | 8181                   |
| ‡28          | Eves, Masters, McManus, Leung, Wong, White                             | 2008  | 963                 | 61368                  | 0                   | 15342                  |
| 29           | Ford and Torok                                                         | 2008  | 1686                | 6022                   | 1459                | 6182                   |
| 30           | Olander, Eves, Puig-Ribera                                             | 2008  | 2833                | 6396                   | 3030                | 7462                   |
| ‡31          | Eves, Olander, Nicoll, Puig-Ribera, Griffin                            | 2009  | 175                 | 20859                  | 0                   | 20859                  |
| ‡32          | Puig-Ribera and Eves                                                   | 2009  | 320                 | 22080                  | 0                   | 7360                   |
| 33           | Andersen                                                               | 2010  | 834                 | 951                    | 555                 | 639                    |
| 34           | Boen, Maurissen, Opdenacker                                            | 2010  | 41                  | 351                    | 6                   | 359                    |
| ‡35          | Grimstvedt, Kerr, Oswald, Fogt, Vargus-Tonsing, Yin                    | 2010  | 63                  | 3845                   | 0                   | 1935                   |
| 36           | Müller-Riemenschneider, Nocon, Reinhold, Willich                       | 2010  | 242                 | 796                    | 205                 | 867                    |
| ‡37          | Webb and Cheng                                                         | 2010  | 196                 | 15341                  | 0                   | 5466                   |
| ‡38          | Lewis and Eves                                                         | 2011  | 60                  | 4624                   | 0                   | 4624                   |
| 39           | Moghaddam, Farahani, Shanbazi                                          | 2011  | 1877                | 9727                   | 438                 | 9727                   |
| 40           | Olander and Eves                                                       | 2011  | 720                 | 1368                   | 762                 | 1590                   |
| ‡41          | Ryan, Lyon, Webb, Eves, Cormac, Ryan                                   | 2011  | 159                 | 12212                  | 0                   | 3053                   |
| 42           | Eves, Olander, Webb, Griffin, Chambers                                 | 2012a | 7708                | 36187                  | 6075                | 26529                  |
| ‡43          | Eves, Webb, Griffin, Chambers                                          | 2012b | 268                 | 21642                  | 0                   | 7214                   |
| ‡44          | Guerrero, Loughhead, Munroe-Chandler                                   | 2012  | 16                  | 1327                   | 0                   | 1327                   |
| 45           | Lee, Perry, Wolf, Agarwal, Rosenblum, Fischer, Grimshaw, Wener, Silver | 2012a | 1313                | 1716                   | 1203                | 1716                   |
| 45           | Lee, Perry, Wolf, Agarwal, Rosenblum, Fischer, Grimshaw, Wener, Silver | 2012b | 871                 | 2576                   | 647                 | 2576                   |
| 45           | Lee, Perry, Wolf, Agarwal, Rosenblum, Fischer, Grimshaw, Wener, Silver | 2012c | 375                 | 2157                   | 280                 | 2157                   |
| 46           | Lewis and Eves                                                         | 2012a | 3403                | 5662                   | 2746                | 4623                   |
| ‡47          | Lewis and Eves                                                         | 2012b | 313                 | 29217                  | 0                   | 19478                  |
| ‡48          | Lewis and Eves                                                         | 2012c | 42                  | 4217                   | 0                   | 4217                   |
| 49           | Chhay                                                                  | 2013  | 1631                | 2961                   | 1315                | 2406                   |

| Study Number | Author                 | Year | Post-intervention   |                        | Pre-intervention    |                        |
|--------------|------------------------|------|---------------------|------------------------|---------------------|------------------------|
|              |                        |      | Number using stairs | Total number of people | Number using stairs | Total number of people |
| ‡50          | Eckhardt, Kerr, Taylor | 2014 | 27                  | 1677                   | 0                   | 1320                   |

‡ Studies were excluded in the sensitivity analysis

For peer review only



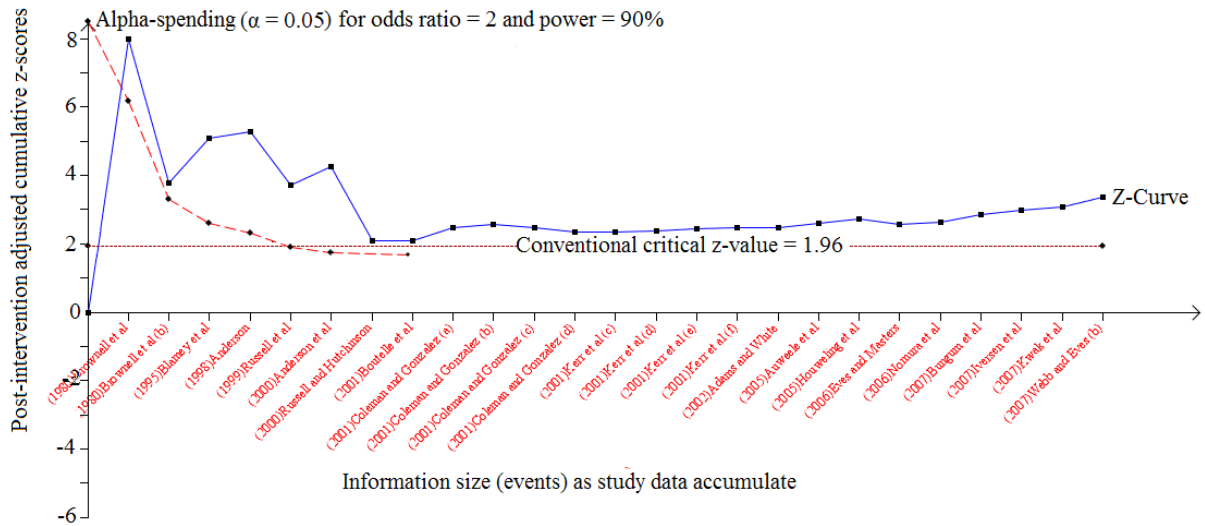

Figure A1. Sensitivity trial sequential analysis showing the effects of stairs signage interventions published from 1980 to 2007 following the removal of studies with extreme odds ratio ( $\geq 7$ ), with heterogeneity and multiple testing adjusted.

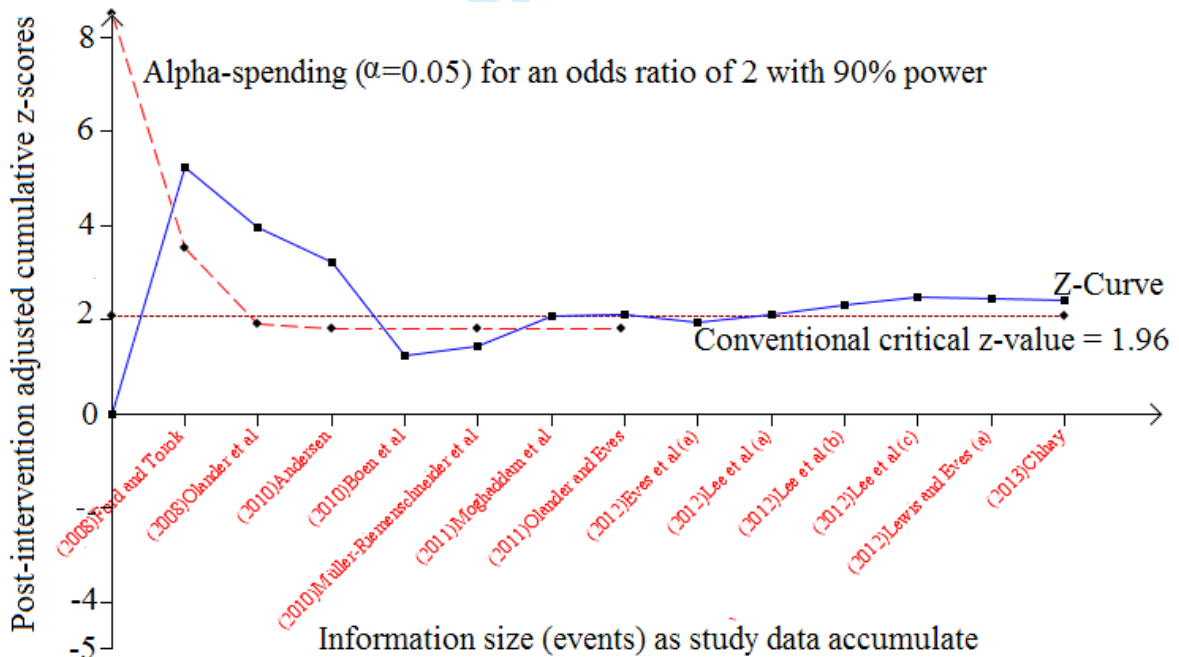

Figure A2. Sensitivity trial sequential analysis showing the effects of stairs signage interventions published from 2008 to 2014 following the removal of studies with extreme odds ratio ( $\geq 7$ ), with heterogeneity and multiple testing adjusted. Note the false evidence for the first three years when the Z-curve is below the alpha-spending function.



# PRISMA 2009 Checklist

1  
2  
3  
4  
5  
6  
7  
8  
9  
10  
11  
12  
13  
14  
15  
16  
17  
18  
19  
20  
21  
22  
23  
24  
25  
26  
27  
28  
29  
30  
31  
32  
33  
34  
35  
36  
37  
38  
39  
40  
41  
42  
43  
44  
45  
46  
47  
48  
49

| Section/topic                      | #  | Checklist item                                                                                                                                                                                                                                                                                              | Reported on page # |
|------------------------------------|----|-------------------------------------------------------------------------------------------------------------------------------------------------------------------------------------------------------------------------------------------------------------------------------------------------------------|--------------------|
| <b>TITLE</b>                       |    |                                                                                                                                                                                                                                                                                                             |                    |
| Title                              | 1  | Identify the report as a systematic review, meta-analysis, or both.                                                                                                                                                                                                                                         | 5,9                |
| <b>ABSTRACT</b>                    |    |                                                                                                                                                                                                                                                                                                             |                    |
| Structured summary                 | 2  | Provide a structured summary including, as applicable: background; objectives; data sources; study eligibility criteria, participants, and interventions; study appraisal and synthesis methods; results; limitations; conclusions and implications of key findings; systematic review registration number. | 2                  |
| <b>INTRODUCTION</b>                |    |                                                                                                                                                                                                                                                                                                             |                    |
| Rationale                          | 3  | Describe the rationale for the review in the context of what is already known.                                                                                                                                                                                                                              | 5                  |
| Objectives                         | 4  | Provide an explicit statement of questions being addressed with reference to participants, interventions, comparisons, outcomes, and study design (PICOS).                                                                                                                                                  | 5                  |
| <b>METHODS</b>                     |    |                                                                                                                                                                                                                                                                                                             |                    |
| Protocol and registration          | 5  | Indicate if a review protocol exists, if and where it can be accessed (e.g., Web address), and, if available, provide registration information including registration number.                                                                                                                               | N/A                |
| Eligibility criteria               | 6  | Specify study characteristics (e.g., PICOS, length of follow-up) and report characteristics (e.g., years considered, language, publication status) used as criteria for eligibility, giving rationale.                                                                                                      | 6                  |
| Information sources                | 7  | Describe all information sources (e.g., databases with dates of coverage, contact with study authors to identify additional studies) in the search and date last searched.                                                                                                                                  | 5-6                |
| Search                             | 8  | Present full electronic search strategy for at least one database, including any limits used, such that it could be repeated.                                                                                                                                                                               | 5-6                |
| Study selection                    | 9  | State the process for selecting studies (i.e., screening, eligibility, included in systematic review, and, if applicable, included in the meta-analysis).                                                                                                                                                   | 6                  |
| Data collection process            | 10 | Describe method of data extraction from reports (e.g., piloted forms, independently, in duplicate) and any processes for obtaining and confirming data from investigators.                                                                                                                                  | 8-9                |
| Data items                         | 11 | List and define all variables for which data were sought (e.g., PICOS, funding sources) and any assumptions and simplifications made.                                                                                                                                                                       | 8-10               |
| Risk of bias in individual studies | 12 | Describe methods used for assessing risk of bias of individual studies (including specification of whether this was done at the study or outcome level), and how this information is to be used in any data synthesis.                                                                                      | N/A                |
| Summary measures                   | 13 | State the principal summary measures (e.g., risk ratio, difference in means).                                                                                                                                                                                                                               | 9-10               |
| Synthesis of results               | 14 | Describe the methods of handling data and combining results of studies, if done, including measures of consistency (e.g., $I^2$ for each meta-analysis).                                                                                                                                                    | 8-10               |



# PRISMA 2009 Checklist

Page 1 of 2

| Section/topic                 | #  | Checklist item                                                                                                                                                                                           | Reported on page #            |
|-------------------------------|----|----------------------------------------------------------------------------------------------------------------------------------------------------------------------------------------------------------|-------------------------------|
| Risk of bias across studies   | 15 | Specify any assessment of risk of bias that may affect the cumulative evidence (e.g., publication bias, selective reporting within studies).                                                             | N/A                           |
| Additional analyses           | 16 | Describe methods of additional analyses (e.g., sensitivity or subgroup analyses, meta-regression), if done, indicating which were pre-specified.                                                         | N/A                           |
| <b>RESULTS</b>                |    |                                                                                                                                                                                                          |                               |
| Study selection               | 17 | Give numbers of studies screened, assessed for eligibility, and included in the review, with reasons for exclusions at each stage, ideally with a flow diagram.                                          | 6-7                           |
| Study characteristics         | 18 | For each study, present characteristics for which data were extracted (e.g., study size, PICOS, follow-up period) and provide the citations.                                                             | Table A1 (supplementary file) |
| Risk of bias within studies   | 19 | Present data on risk of bias of each study and, if available, any outcome level assessment (see item 12).                                                                                                | N/A                           |
| Results of individual studies | 20 | For all outcomes considered (benefits or harms), present, for each study: (a) simple summary data for each intervention group (b) effect estimates and confidence intervals, ideally with a forest plot. | N/A                           |
| Synthesis of results          | 21 | Present results of each meta-analysis done, including confidence intervals and measures of consistency.                                                                                                  | N/A                           |
| Risk of bias across studies   | 22 | Present results of any assessment of risk of bias across studies (see Item 15).                                                                                                                          | N/A                           |
| Additional analysis           | 23 | Give results of additional analyses, if done (e.g., sensitivity or subgroup analyses, meta-regression [see Item 16]).                                                                                    | N/A                           |
| <b>DISCUSSION</b>             |    |                                                                                                                                                                                                          |                               |
| Summary of evidence           | 24 | Summarize the main findings including the strength of evidence for each main outcome; consider their relevance to key groups (e.g., healthcare providers, users, and policy makers).                     | 11-17                         |
| Limitations                   | 25 | Discuss limitations at study and outcome level (e.g., risk of bias), and at review-level (e.g., incomplete retrieval of identified research, reporting bias).                                            | 18                            |
| Conclusions                   | 26 | Provide a general interpretation of the results in the context of other evidence, and implications for future research.                                                                                  | 15-17                         |
| <b>FUNDING</b>                |    |                                                                                                                                                                                                          |                               |
| Funding                       | 27 | Describe sources of funding for the systematic review and other support (e.g., supply of data); role of funders for the systematic review.                                                               | N/A                           |

From: Moher D, Liberati A, Tetzlaff J, Altman DG, The PRISMA Group (2009). Preferred Reporting Items for Systematic Reviews and Meta-Analyses: The PRISMA Statement. PLoS Med 6(7): e1000097. doi:10.1371/journal.pmed1000097

For peer review only - <http://bmjopen.bmj.com/site/about/guidelines.xhtml>

For more information, visit: [www.prisma-statement.org](http://www.prisma-statement.org).



# PRISMA 2009 Checklist

For peer review only

1  
2  
3  
4  
5  
6  
7  
8  
9  
10  
11  
12  
13  
14  
15  
16  
17  
18  
19  
20  
21  
22  
23  
24  
25  
26  
27  
28  
29  
30  
31  
32  
33  
34  
35  
36  
37  
38  
39  
40  
41  
42  
43  
44  
45  
46  
47  
48  
49
