# Supplementary material for: Is there sufficient evidence regarding signage-based stair use interventions? A sequential meta-analysis
Source: PubMed Central journal article supplement — BMJ Open. 2017 Nov 28;7(11):e012459. doi: 10.1136/bmjopen-2016-012459 (PMC5719260; doi:10.1136/bmjopen-2016-012459), 2017-11-28
Supplement: bmjopen-2016-012459supp001.pdf [file bmjopen-2016-012459supp001.pdf]

1  
2  
3  
4

Table A1. Stair use signage studies that met the selection criteria for inclusion in the meta-analysis showing the year of publication and the number of pre- and post -stair use observations

| Study Number | Author                                                   | Year  | Post-intervention   |                        | Pre-intervention    |                        |
|--------------|----------------------------------------------------------|-------|---------------------|------------------------|---------------------|------------------------|
|              |                                                          |       | Number using stairs | Total number of people | Number using stairs | Total number of people |
| 1            | Brownell, Stunkard, Albaum                               | 1980a | 759                 | 5273                   | 332                 | 5273                   |
| 1            | Brownell, Stunkard, Albaum                               | 1980b | 1981                | 10825                  | 459                 | 3960                   |
| 2            | Blamey, Mutrie, Aitkinson                                | 1995  | 1528                | 8352                   | 323                 | 2784                   |
| 3            | Andersen                                                 | 1998  | 923                 | 13151                  | 456                 | 9500                   |
| 4            | Russell, Dzewaltowski, Ryan                              | 1999  | 1269                | 3029                   | 1265                | 3187                   |
| 5            | Andersen, Franckowiak, Zuzak, Cummings, Crespo           | 2000  | 975                 | 4479                   | 853                 | 5287                   |
| 6            | Russell and Hutchinson                                   | 2000  | 14                  | 91                     | 5                   | 64                     |
| 7            | Boutelle, Jeffery, Murray, Schmitz                       | 2001  | 1201                | 9460                   | 788                 | 7095                   |
| 8            | Coleman and Gonzalez                                     | 2001a | 154                 | 3386                   | 58                  | 3386                   |
| 8            | Coleman and Gonzalez                                     | 2001b | 1353                | 24050                  | 964                 | 24050                  |
| 8            | Coleman and Gonzalez                                     | 2001c | 2824                | 8164                   | 2918                | 8164                   |
| 8            | Coleman and Gonzalez                                     | 2001d | 855                 | 2788                   | 926                 | 2788                   |
| 9            | Kerr, Eves, Carroll                                      | 2001a | 3266                | 17748                  | 479                 | 5916                   |
| ‡10          | Kerr, Eves, Carroll                                      | 2001b | 239                 | 11340                  | 0                   | 3780                   |
| ‡11          | Kerr, Eves, Carroll                                      | 2001c | 262                 | 11999                  | 0                   | 7993                   |
| 12           | Kerr, Eves, Carroll                                      | 2001d | 1738                | 7940                   | 1442                | 7042                   |
| 13           | Kerr, Eves, Carroll                                      | 2001e | 1103                | 15758                  | 1075                | 18056                  |
| 13           | Kerr, Eves, Carroll                                      | 2001f | 3536                | 8440                   | 3216                | 8440                   |
| 14           | Adams and White                                          | 2002  | 365                 | 1770                   | 352                 | 1750                   |
| ‡15          | Marshall, Bauman, Patch, Wilson, Chen                    | 2002  | 277                 | 26392                  | 0                   | 39588                  |
| 16           | Auweele, Boen, Schapendonk, Dornez                       | 2005  | 581                 | 755                    | 568                 | 823                    |
| 17           | Houweling, Stoopendaal, Kleefstra, Meyboom-de Jong, Bilo | 2005  | 565                 | 891                    | 486                 | 891                    |
| ‡18          | Webb and Eves                                            | 2005  | 532                 | 21732                  | 0                   | 10866                  |
| 19           | Eves and Masters                                         | 2006  | 8670                | 28901                  | 10404               | 28901                  |
| ‡20          | Eves, Webb, Mutrie                                       | 2006  | 132                 | 28901                  | 0                   | 3916                   |
| 21           | Nomura, Enopki, Okazaki, Sato                            | 2006  | 2872                | 5620                   | 1293                | 2810                   |
| 22           | Bungum, Meacham, Truax                                   | 2007  | 273                 | 711                    | 154                 | 675                    |
| 23           | Iversen, Handel, Jensen, Frederiksen, Heitmann           | 2007  | 2876                | 10800                  | 2184                | 10983                  |
| 24           | Kwak, Kremers, van Baak, Brug                            | 2007  | 382                 | 1012                   | 223                 | 683                    |

| Study Number | Author                                                                 | Year  | Post-intervention   |                        | Pre-intervention    |                        |
|--------------|------------------------------------------------------------------------|-------|---------------------|------------------------|---------------------|------------------------|
|              |                                                                        |       | Number using stairs | Total number of people | Number using stairs | Total number of people |
| ‡25          | Webb and Eves                                                          | 2007a | 818                 | 28206                  | 0                   | 14103                  |
| 26           | Webb and Eves                                                          | 2007b | 1928                | 13204                  | 350                 | 6602                   |
| ‡27          | Cooley, Foley, Magnussen                                               | 2008  | 98                  | 16362                  | 0                   | 8181                   |
| ‡28          | Eves, Masters, McManus, Leung, Wong, White                             | 2008  | 963                 | 61368                  | 0                   | 15342                  |
| 29           | Ford and Torok                                                         | 2008  | 1686                | 6022                   | 1459                | 6182                   |
| 30           | Olander, Eves, Puig-Ribera                                             | 2008  | 2833                | 6396                   | 3030                | 7462                   |
| ‡31          | Eves, Olander, Nicoll, Puig-Ribera, Griffin                            | 2009  | 175                 | 20859                  | 0                   | 20859                  |
| ‡32          | Puig-Ribera and Eves                                                   | 2009  | 320                 | 22080                  | 0                   | 7360                   |
| 33           | Andersen                                                               | 2010  | 834                 | 951                    | 555                 | 639                    |
| 34           | Boen, Maurissen, Opdenacker                                            | 2010  | 41                  | 351                    | 6                   | 359                    |
| ‡35          | Grimstvedt, Kerr, Oswald, Fogt, Vargas-Tonsing, Yin                    | 2010  | 63                  | 3845                   | 0                   | 1935                   |
| 36           | Müller-Riemenschneider, Nocon, Reinhold, Willich                       | 2010  | 242                 | 796                    | 205                 | 867                    |
| ‡37          | Webb and Cheng                                                         | 2010  | 196                 | 15341                  | 0                   | 5466                   |
| ‡38          | Lewis and Eves                                                         | 2011  | 60                  | 4624                   | 0                   | 4624                   |
| 39           | Moghaddam, Farahani, Shanbazi                                          | 2011  | 1877                | 9727                   | 438                 | 9727                   |
| 40           | Olander and Eves                                                       | 2011  | 720                 | 1368                   | 762                 | 1590                   |
| ‡41          | Ryan, Lyon, Webb, Eves, Cormac, Ryan                                   | 2011  | 159                 | 12212                  | 0                   | 3053                   |
| 42           | Eves, Olander, Webb, Griffin, Chambers                                 | 2012a | 7708                | 36187                  | 6075                | 26529                  |
| ‡43          | Eves, Webb, Griffin, Chambers                                          | 2012b | 268                 | 21642                  | 0                   | 7214                   |
| ‡44          | Guerrero, Loughhead, Munroe-Chandler                                   | 2012  | 16                  | 1327                   | 0                   | 1327                   |
| 45           | Lee, Perry, Wolf, Agarwal, Rosenblum, Fischer, Grimshaw, Wener, Silver | 2012a | 1313                | 1716                   | 1203                | 1716                   |
| 45           | Lee, Perry, Wolf, Agarwal, Rosenblum, Fischer, Grimshaw, Wener, Silver | 2012b | 871                 | 2576                   | 647                 | 2576                   |
| 45           | Lee, Perry, Wolf, Agarwal, Rosenblum, Fischer, Grimshaw, Wener, Silver | 2012c | 375                 | 2157                   | 280                 | 2157                   |
| 46           | Lewis and Eves                                                         | 2012a | 3403                | 5662                   | 2746                | 4623                   |
| ‡47          | Lewis and Eves                                                         | 2012b | 313                 | 29217                  | 0                   | 19478                  |
| ‡48          | Lewis and Eves                                                         | 2012c | 42                  | 4217                   | 0                   | 4217                   |
| 49           | Chhay                                                                  | 2013  | 1631                | 2961                   | 1315                | 2406                   |

| Study Number | Author                 | Year | Post-intervention   |                        | Pre-intervention    |                        |
|--------------|------------------------|------|---------------------|------------------------|---------------------|------------------------|
|              |                        |      | Number using stairs | Total number of people | Number using stairs | Total number of people |
| ‡50          | Eckhardt, Kerr, Taylor | 2014 | 27                  | 1677                   | 0                   | 1320                   |

‡ Studies were excluded in the sensitivity analysis

5  
6  
7

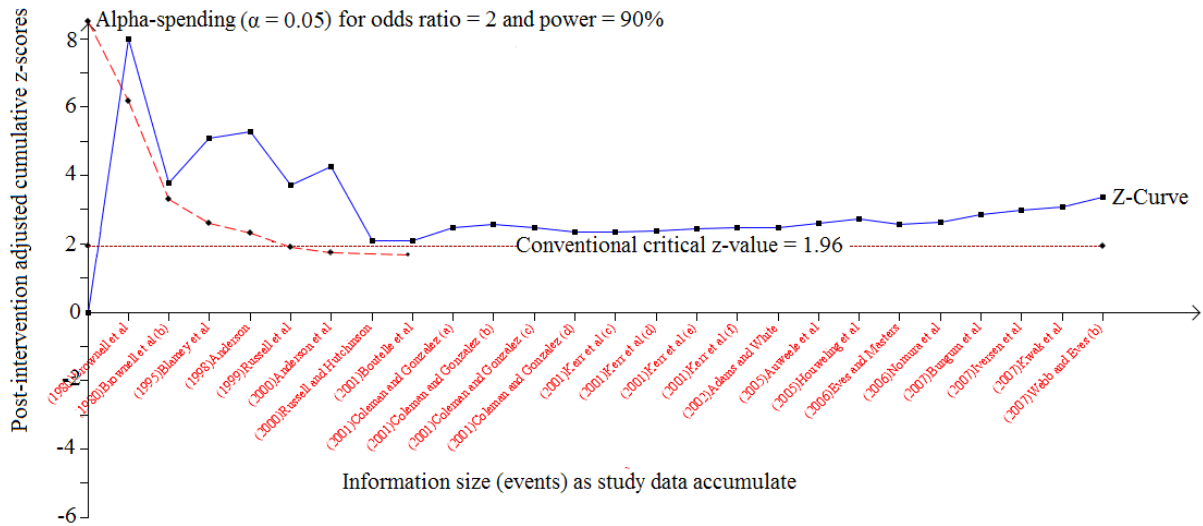

Figure A1. Sensitivity trial sequential analysis showing the effects of stairs signage interventions published from 1980 to 2007 following the removal of studies with extreme odds ratio ( $\geq 7$ ), with heterogeneity and multiple testing adjusted.

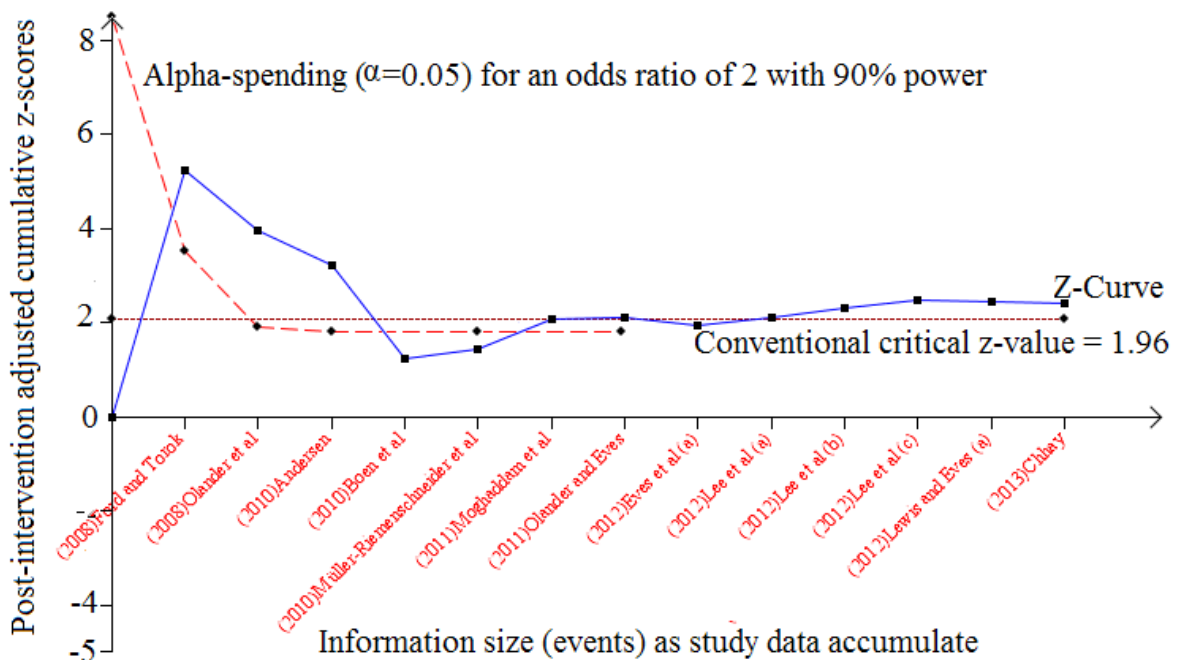

Figure A2. Sensitivity trial sequential analysis showing the effects of stairs signage interventions published from 2008 to 2014 following the removal of studies with extreme odds ratio ( $\geq 7$ ), with heterogeneity and multiple testing adjusted. Note the false evidence for the first three years when the Z-curve is below the alpha-spending function.
